# Supplementary material for: Bicycling to school improves the cardiometabolic risk factor profile: a randomised controlled trial
Source: PubMed Central journal article supplement — BMJ Open. 2012 Oct 31;2(6):e001307. doi: 10.1136/bmjopen-2012-001307 (PMC3533114; doi:10.1136/bmjopen-2012-001307), 2012-10-31
Supplement: bmjopen-2012-001307.draft_revisions.pdf [file bmjopen-2012-001307.draft_revisions.pdf]

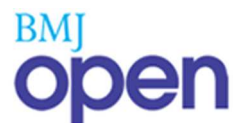

**Bicycling to school improves the cardiometabolic risk factor profile: a randomised controlled trial**

|                                 |                                                                                                                                                                                                                                                                                                                                                                                                                                  |
|---------------------------------|----------------------------------------------------------------------------------------------------------------------------------------------------------------------------------------------------------------------------------------------------------------------------------------------------------------------------------------------------------------------------------------------------------------------------------|
| Journal:                        | <i>BMJ Open</i>                                                                                                                                                                                                                                                                                                                                                                                                                  |
| Manuscript ID:                  | bmjopen-2012-001307                                                                                                                                                                                                                                                                                                                                                                                                              |
| Article Type:                   | Research                                                                                                                                                                                                                                                                                                                                                                                                                         |
| Date Submitted by the Author:   | 20-Apr-2012                                                                                                                                                                                                                                                                                                                                                                                                                      |
| Complete List of Authors:       | Østergaard, Lars; University of Southern Denmark, Institute of Sports Science and Clinical Biomechanics<br>Børrestad, Line; University of Southern Denmark, Institute of Sports Science and Clinical Biomechanics<br>Tarp, Jakob; University of Southern Denmark, Institute of Sports Science and Clinical Biomechanics<br>Andersen, Lars; University of Southern Denmark, Institute of Sports Science and Clinical Biomechanics |
| <b>Primary Subject Heading</b>: | Public health                                                                                                                                                                                                                                                                                                                                                                                                                    |
| Secondary Subject Heading:      | Epidemiology, Sports and exercise medicine                                                                                                                                                                                                                                                                                                                                                                                       |
| Keywords:                       | cardiometabolic, risk factors, bicycling, children, commuting                                                                                                                                                                                                                                                                                                                                                                    |
|                                 |                                                                                                                                                                                                                                                                                                                                                                                                                                  |

SCHOLARONE™  
Manuscripts

## TITLE PAGE

**Bicycling to school improves the cardiometabolic risk factor profile: a randomised controlled trial**

Lars Østergaard<sup>1</sup>, Line A B Børrestad<sup>1,2</sup>, Jakob Tarp<sup>1</sup>, Lars Bo Andersen<sup>1,3</sup>

<sup>1</sup>Center for Research in Childhood Health, Institute of Sports Science and Clinical Biomechanics, University of Southern Denmark, Odense (5230), Denmark

<sup>2</sup>Institute of Public Health, Sport and Nutrition, Faculty of Health and Sport, University of Agder, Kristiansand (4604), Norway

<sup>3</sup>Department of Sports Medicine, Norwegian School of Sport Sciences, Oslo (0863), Norway.

Correspondence to: [lostergaard@health.sdu.dk](mailto:lostergaard@health.sdu.dk)

Keywords: cardiometabolic, risk factors, bicycling, children, commuting

Word count: Abstract: 199, Main text: 4.343

**ABSTRACT****Objectives:**

To investigate whether bicycling to school improve cardiometabolic risk factor profile and cardiorespiratory fitness among children.

**Design:**

Prospective, blinded, randomised controlled trial.

**Setting:**

Single centre study in Odense, Denmark.

**Participants:**

43 children previously not bicycling to school were randomly allocated to control group (n=20) (i.e. no change in lifestyle) or intervention group (i.e. bicycling to school) (n=23).

**Primary and secondary outcome measures:**

Change in cardiometabolic risk factor score and change in cardiorespiratory fitness.

**Results:**

All participants measured at baseline returned at follow-up. Based upon intention to treat analyses, clustering of cardiometabolic risk factors was lowered by 0.58 SD (95% CI -1.03 to -0.14, p= 0.012) in the bicycling group compared to the control group. Cardiorespiratory fitness ( $L O_2 \cdot \text{min}^{-1}$ ) per se did not increase significantly more in the intervention than in the control group (beta = 0.0337, 95% CI -0.06 to 0.12, p=0.458).

**Conclusions:**

Bicycling to school counteracted a clustering of cardiometabolic risk factors and should thus be recognized as potential prevention of type 2 diabetes mellitus and cardiovascular disease. The intervention did, however, not elicit a larger increase in cardiorespiratory fitness in the intervention group as compared to the control group.

**Trial registration:**

Registered at [www.clinicaltrials.gov](http://www.clinicaltrials.gov) (NCT01236222)

**ARTICLE SUMMARY****Article focus**

- Intervention studies investigating whether bicycling to school in fact cause improved cardiometabolic health have not yet been carried out.
- The aim of this study was to investigate whether bicycling to school cause an increase in cardiorespiratory fitness and induce improvement of clustering of cardiometabolic risk factors

**Key messages**

- This study is the first study to document that bicycling to school had positive effect on clustering of cardiometabolic risk factors in children and thus in the prevention of diabetes and cardiovascular disease.
- The result from this study suggests investment in infrastructure and promotion of bicycling to school in general.

**Strengths and Limitations**

- The major strength of this study was the randomised design which through elimination of bias allowed for investigation of a causal relationship between bicycling to school and health outcomes.
- Relatively weak statistical power and impossibility of blindness of the treatment.

## INTRODUCTION

The metabolic syndrome (MS) is the concurrence of multiple risk factors associated with cardiovascular disease and type 2 diabetes mellitus. Prevalence is between 20-30% of the adult population in most countries[1], and a rising incidence in children and adolescents[2], indicates that the condition represents a major threat to global public health. Exposure of the MS confers a doubled risk of incident cardiovascular event and death[3] and up to 5-times higher risk of developing type 2 diabetes mellitus in adults[4]. Furthermore, since clustering of cardiometabolic risk factors track from childhood to adulthood[5] early prevention of the MS is important in order to prevent occurrence of disease later in life.

In children and adolescents physical activity has the potential to prevent a clustering of risk factors[6], underpinned by the notion that an increase of daily moderate physical activity by 10-20% is associated with 33% lower risk of having the MS[7].

Active commuting such as walking and bicycling to school might be important contributors of preventive physical activity. Observational studies indicate that bicycling to school is beneficial to health since higher cardiorespiratory fitness[8] and lower BMI[9] have been observed in children bicycling to school compared to non-cyclists. If bicycling to school is generally acknowledged as a time-efficient and feasible form of daily physical activity it could potentially target the entire population. From a public health perspective this would be very appealing considering that the greatest health benefits are achieved in the least active individuals [10].

There seems to be wide-ranging scepticism about the opportunity to bicycle to school in industrialized societies. The level of concern, however seems often to be negatively associated with the prevalence of bicycling to school, which in Denmark for instance is about 60% among adolescents [8,9] whereas in the UK approximately 2% bicycle to school [11].

Intervention studies investigating whether bicycling to school in fact cause improved cardiometabolic health have not yet been carried out. One reason for this could be that very few countries have an infrastructure allowing safe commuting by bike to school. Another reason could be that interventions often include change in the built environment in order to provide safe routes and this is difficult to control in a rigid study design.

The evidence linking bicycle commuting with cardiometabolic health in children is still limited. Hence, the aim of this study is to investigate, in a randomised trial, whether bicycling to school cause an increase in cardiorespiratory fitness and induce improvement of clustering of cardiometabolic risk factors.

## METHODS

### Study participants

This study took place in Denmark in the municipality of Odense during spring 2011. Participants were recruited through invitation letters sent to 36 elementary public schools in the municipality of Odense. Investigators then visited 10 of these schools (approximately 92 classes) and presented the project. Additionally, the project was presented online and in a radio spot. Participants were included if they had not bicycled regularly to and from school for at least 3 months prior to the intervention, and if willing to be randomised to one of the two study groups (i.e. control group or bicycling group). Reasons for exclusion were not having a bike, and/or affirming less than one km between home and school. One hundred and eighty-nine children volunteered to participate in the study. One hundred and thirty-one of these, however, claimed that they bicycled regularly to school, and four withdrew from the study due to a changed family situation. Fifty-four eligible children were subsequently randomised to either control or intervention. After randomisation six and five participants from control and intervention group, respectively, withdrew since they did not accept being randomized, leaving 43 participants in the study (Figure 1). Written informed consent was obtained from the child's parent or legal guardian after they were given a detailed written explanation of the aims of the study, possible hazards, discomfort, and inconvenience, and the option to withdraw at any time. The study was approved by the regional Ethics Committee (S-20100009) and registered at [clinicaltrials.gov](http://clinicaltrials.gov) (NCT01236222) with the purpose of investigating the effect of bicycling to school on the metabolic syndrome and aerobic fitness.

### Study design and intervention

Participants were randomly assigned to a control group (i.e. no change in lifestyle) or to an experimental group (i.e. commuter bicycling). A permuted random block size (2, 4 and 6) randomisation ([www.randomization.com](http://www.randomization.com)) was used in order to reduce the chances of the assignment schedule being seen by those responsible for recruitment of participants[12]. Twenty participants were allocated to the control group and 23 participants to the bicycling group. All measurements were repeated at the conclusion of the 8-week intervention program. There were no restrictions beside the mode of transportation to school. The study period comprised one week of national holiday and additionally two bank holidays where no children attended school. Matching baseline test date with follow-up test was strived for, but logistically not possible for all participants. This has implications on the amount of exposure the intervention group was able to accumulate. Participants could maximally accumulate between 56 and 74 trips to and from school during the study period. All measurements at baseline and follow-up were conducted by personal blinded to group allocation. Children were picked up and returned to their home

addresses when scheduled for baseline and follow-up tests.

### Measurements

Height was measured by a stadiometer (SECA, Hamburg, Germany), children wearing socks or bare feet and weight was assessed by a 0.1 kg precision scale (Soehnle Professional, Murrhardt, Germany) wearing only shorts and t-shirts. Skinfold thickness was measured on the left side with a Harpenden caliper (John Bull, British Indicators Ltd., West Sussex, England) at the biceps, triceps, subcapsular, and suprailiac sites.

Overweight/obesity status was defined according to age- and gender specific published cut-points for BMI[13].

Systolic and diastolic blood pressure was measured by a sphygmomanometer (DINAMAP ProCare 100, General electric, USA). At least five measurements were made on the left arm with two min interval and the mean of the final three measurements were used as systolic and diastolic pressure.

All Children were instructed to fast overnight (>8 hours), and only allowed to drink water until the blood sample was drawn. Blood was drawn from the right fossa cubitus by a biomedical laboratory scientist. If a participant had not been fasting or if he/she had experienced any illness during the last week, a new test day was scheduled for that child. Samples were analysed for: Glucose, insulin, cholesterol, triglyceride. Insulin resistance was estimated according to the homoeostasis model assessment (HOMA) as the product of fasting glucose (mmol/L) and insulin ( $\mu\text{U}/\text{mL}$ ) divided by the constant 22.5[14]. Breakfast was served on site subsequent of blood sampling. All analysis of the blood specimens were conducted at Department of Clinical Biochemistry and Pharmacology, Odense Universityhospital

Aerobic fitness ( $\dot{V}\text{O}_2\text{peak}$ ) was determined in a progressive bicycle test with on an electronically braked ergometer (Monark 839 Ergomedic, Varberg, Sweden). Pulmonary gas exchange was measured with a metabolic cart (Amis2001, Innovision, Denmark) with 15 seconds epoch, and the highest value within 30 seconds was regarded as a maximal if RER was  $\geq 0.99$  or maximal HR was  $\geq 185$  beats/min, and the test leader judged the participant to show signs of intense effort (e.g. facial flushing or difficulties in keeping up the pedal frequency)[15]. Heart rate (HR) was measured with a HRM (Polar RS800CX, Kempele, Finland) with epoch set to 1 sec. Children were thoroughly explained the purpose of the test and that it would require a maximal effort. After a warm-up period of 5 minutes at 40W, work-load was increased 40W every 2 minutes until volitional exertion. Verbal encouragement was given throughout the test and recommended pedaling cadence was 60-80 rpm.

Children completed a general questionnaire regarding transportation to school, sports-habits, and general quality of life. At follow up all children marked their route to school using a web-based map tool ([www.loebererute.dk](http://www.loebererute.dk)).

1  
2  
3  
4 All children had their bike equipped with an odometer on average two weeks before baseline  
5 measurement. The odometers were individually calibrated in accordance to wheel circumference.  
6  
7 Odometer levels were self-reported, by participants in both groups, every Sunday until tested at follow-up  
8  
9 by means of a commercial SMS system (SMS-Track ApS). Participants who did not answer Sunday were  
10  
11 contacted Monday. Malfunctioning odometers were replaced within a few days.

12 Both groups were instructed to report daily mode of school transportation on a custom made  
13  
14 transport diary. Total mileage of school related bicycling during the study was calculated from the distance  
15  
16 to school (web route assessment) times the number of trips to/from school (transport diary).

17 Field measurement of intensity of bicycling to school was carried out midway (five weeks after baseline).  
18  
19 Participants in the intervention group received a GPS (Qstarz BT-Q1300S, Qstarz International Inc., Taiwan)  
20  
21 and a heart rate monitor (HRM) (PolarTeam<sup>2</sup>, Polar, Kempele, Finland) and were instructed to wear the  
22  
23 devices during one day. Both GPS and HRM were set at an epoch of 5 second. All GPS data were transferred  
24  
25 to commercial software (Travel recorder v. 5.0) and corrected for drift using manufacturer software. The  
26  
27 GPS was the reference for all HRM data. Mean HR of school transportation, if verified by the diary, was  
28  
29 calculated as the mean of the measurements from the first data point when the child exceeded a speed of  
30  
31 5 km/h when leaving home, to the last data point above 5 km/h when the child arrived at school. Both  
32  
33 compliant and non-compliant participants were included in the determination of commuter bicycling  
34  
35 intensity since the primary outcome is based on intention to treat (ITT) analyses.

36 Physical activity beyond bicycling was assessed with an accelerometer (Actigraph GT3X,  
37  
38 Manufacturing Technology Inc, Fort Walton Beach, FL, USA). Physical activity was monitored for 7  
39  
40 consecutive days from Monday to Sunday at baseline and midway (five weeks after baseline). Instruments  
41  
42 were attached at the hip, and counts were sampled every two seconds. Data reduction was performed with  
43  
44 customised software (Propero, Odense, Denmark). Only data from the vertical axis was included in the data  
45  
46 analyses. Criteria for a successful recording were a minimum of 3 days of 10 h recording per day. Time  
47  
48 periods of at least 30 consecutive minutes of zero counts were deemed to represent periods when the  
49  
50 monitor was not worn and thus disregarded. Cut points for intensity levels were based on the  
51  
52 Freedson/Trost equation[16]. Since cutpoints for physical activity intensity are specifically designed for 1  
53  
54 min epoch these were divided by 30. The average time the accelerometer was worn was 13.5 and 13.6 h  
55  
56 per day at baseline and follow up, respectively, and the number of minutes spent in the different intensity  
57  
58 intervals was proportionally adjusted to 14 h with the following equation: adjusted minutes=(observed in  
59  
60 interval) $\times$ (14 $\times$ 60/total minutes) [17].

Values for all blood parameters at both baseline and follow-up are missing in one participant from  
the intervention group due to needle phobia. Insulin and HOMA values were regarded as missing for one



1  
2  
3  
4 participant in the control group due to type 1-diabetes. Follow up cholesterol for one person and baseline  
5 HOMA for another participant from the intervention group were not obtained due to irregularity at the  
6 laboratory. Systolic blood pressure is missing in one participant due to resistance.  
7  
8

9 One participant from the intervention group performed maximal tests, but was not measured with  
10 the metabolic cart.  $\dot{V}O_2$ peak was in this case estimated from the regression equation between power  
11 output (MPO) and  $\dot{V}O_2$ peak of the study sample. Change in  $\dot{V}O_2$ peak was considered missing in 3  
12 participants since test criteria was not met at follow-up.  
13  
14

### 15 16 17 **Statistics**

18 Crude baseline measurements were compared between the bicycling and the control group participants  
19 using unpaired mean comparison tests (t-tests), whereas paired t-tests were used in within group  
20 comparisons from baseline to follow-up.  
21  
22

23 Post intervention values were analysed across the two groups using univariate analysis of co-variance  
24 (ANCOVA), as suggested by Twisk and Proper[18], with participants grouped as originally randomised  
25 regardless of the degree of intervention compliance and types of activity actually performed. In efficacy  
26 analyses participants are referred to as compliant in the intervention group if at least 80% of possible trips  
27 to school were by bike on contrast participants in the control group are considered compliant if less than  
28 20% of possible trips were by bike. Change in outcome was compared between the bicycling and the  
29 control group with adjustment for baseline measure and gender. All covariates were selected a priori and  
30 thus in any case kept in the statistical modeling even if non-significant. Regression analyses were preceded  
31 by verification of fulfillment of parametric assumptions by qq-plots and Shapiro Wilks tests.  
32  
33

34 Z scores (observed value - baseline mean / baseline SD) were computed for each of the variables  
35 included in the composite Z score. A high Z score value (or an increase) is considered to have adverse health  
36 effects for all variables included in the composite score with exception of cardiorespiratory fitness where  
37 inverse values were calculated. Composite Z scores, based on baseline and follow-up measurements, were  
38 constructed as a mean of the available standardised selected risk factors (fasting triglyceride, insulin  
39 sensitivity (HOMA), sum of four skinfolds, systolic blood pressure, total cholesterol/HDL ratio and  
40 inverse aerobic fitness). Composite baseline and follow-up Z scores were then standardised according to  
41 the baseline mean and SD allowing for interpretation of change in composite Z score. Subsequently the  
42 change in standardised composite Z score was calculated as (standardised mean of Z scores at follow up -  
43 standardised mean of Z scores at baseline).  
44  
45

46 Assuming a mean change of 10% in  $\dot{V}O_2$ peak and a SD of change of  $0.3 \text{ L O}_2 \cdot \text{min}^{-1}$  the study needed  
47 21 participants in both groups to be powered at 80%. All analyses were conducted using STATA IC version  
48  
49  
50  
51  
52  
53  
54  
55  
56  
57  
58  
59  
60

1  
2  
3  
4 11.0 (STATA Corp, College station) with alpha=0.05.  
5  
6  
7

## 8 **RESULTS**

### 9 **Background characteristics**

10 Of the 54 participants randomized, 11 declined to participate (two due to moving, one due to personal  
11 reasons, one due to parental job situation, two due to test methods and five not accepting randomisation)  
12 leaving 43 participants (79.6%) in the study. No subjects experienced accidents or other harms. All 43  
13 participants were measured at baseline and returned for follow-up (Fig. 1). Based on published age and  
14 gender BMI cut-off values [13] no participants were obese at baseline, whereas three and two participants  
15 were overweight in the bicycling and control group, respectively. There were no statistical differences  
16 between the control group and the bicycling group participants who completed the 8-week intervention  
17 period on any of the baseline features presented in Table 1, nor was there any baseline difference in the  
18 two primary dependent variables:  $\dot{V}O_2$ peak and mean of Z scores.  
19  
20  
21  
22  
23  
24  
25  
26  
27

28 (insert table 1 here)  
29  
30

### 31 **Adherence**

32 All of the 43 allocated participants were available at follow-up assessments. Five participants in the  
33 intervention group and one in the control group were defined as non-compliant. The average compliance  
34 was 96.2% and 84.2 % in the control and the intervention group, respectively.  
35  
36  
37  
38  
39  
40

41 (insert table 2 here)  
42  
43  
44

45 (insert table 3 here)  
46  
47  
48  
49  
50  
51  
52  
53  
54  
55  
56  
57  
58  
59  
60

### Change in $\dot{V}O_2$ peak from baseline to follow-up

Crude comparisons of the effects within groups showed that  $\dot{V}O_2$  peak mean increased from 1.81 at baseline to 1.87 L O<sub>2</sub> min<sup>-1</sup> at follow-up (i.e. an increase by 3.3%) in the intervention group whereas the change in the control group was 1.69 vs. 1.73 L O<sub>2</sub> min<sup>-1</sup> (i.e. an increase by 2.3%). Based on adjusted ITT regression analyses children who started bicycling to school did not improve fitness (beta = 0.0336911, p= 0.458) compared to controls. Likewise based on adjusted estimates from efficacy analyses children who started bicycling to school did not improve fitness (beta = 0.0425191, p= 0.404) compared to controls. There was a significant association (p<0.001) between kilometers bicycled to school and fitness improvement (figure 2).

### Change in composite Z score from baseline to follow-up

Crude comparisons of the effects within groups showed that the standardised composite Z score decreased from 0.01 at baseline to -0.26 at follow-up in the intervention group, whereas in the control group the corresponding change was from 0.01 to 0.28.

Based on adjusted ITT regression analyses children who started bicycling to school lowered their composite standardised Z score (beta = -0.58, p=0.012) compared to controls. Based on adjusted efficacy analyses children who started bicycling to school lowered their standardised composite Z score (beta = -0.63, p=0.015) compared to controls. There was no significant association (p=0.512) between kilometers bicycled to school and change in composite Z score.

Post hoc regression analyses of the 6 Z transformed delta variables included in the composite score showed that every single variable, although statistically non-significant individually, contributed to the lower standardised composite score in the intervention group. Standardised delta coefficients were: Inverse fitness -0.085867 (p= 0.458), systolic blood pressure -0.1074832 (p=0.644), sum of 4 skinfolds -0.1522508 (p=0.118), triglyceride -0.2713089 (p=0.295), cholesterol ratio -0.0405599 (p=0.838), HOMA score -0.4582449 (p=0.049).

(insert table 4 here)

## DISCUSSION

### Statement of principal findings

The main finding in this study was that bicycling to school for a period of 8 weeks significantly lowered clustering of cardiometabolic risk factors by 0.58 SD. The effect size estimate was different between the control and the intervention group in ITT analyses, though not all participants were fully compliant during the study period. The level of statistical significance of the clustered risk score was statistically significant even when multiple testing (due to two outcomes) was taken into account with the conservative Bonferroni method [19].

Post hoc regression analyses of the 6 Z transformed delta variables included in the composite score showed that every included variable contributed to the improved clustered score. This is noteworthy since it indicates a consistent positive effect of cycling to school on a range of various health parameters.

The composite risk factor score was used in order to compensate for the day-to-day fluctuation in the single risk factors and included the same variables as in previous studies by our group[6]. A continuous score as a proxy of the metabolic syndrome was chosen in favor of a dichotomous outcome in order to enhance statistical sensitivity, and because it is considered to describe the metabolic health condition better [20]. Further, none of the children had MS according to the definition by the International Diabetes Federation [21].

Bicycling to school did not have the expected effect on cardiorespiratory fitness per se since no significant difference between cyclists and controls was observed. This was contra intuitive since 4.6-5.9 % higher aerobic power has been reported in cross sectional studies comparing adolescents bicycling to school to walkers and passive transporters [22]. Furthermore a 9 % improvement has been found in children who started bicycling to school in prospective studies by Cooper et al. [23]. The discrepancy might be due to a relatively short intervention period in the present study and perhaps also because of too short distance to school. The latter being indirectly indicated from the significant association between kilometers bicycled to school and cardiorespiratory fitness improvement. In this connection it is noteworthy that a 7.3% improvement in  $\dot{V}O_2\text{max}$  [24] has been observed in a randomised study of adults who started bicycling to work and that the commuting trip on average was about 5km, which is twice the distance of the children included in this study. Finally, we cannot rule out that the non-significant difference in changes of  $\dot{V}O_2\text{peak}$  between groups could be a consequence of lack of statistical power (i.e. type II-error) since a change in  $\dot{V}O_2\text{peak}$  by 10% would require 21 perfectly compliant participants in both groups to be powered at 80%.

1  
2  
3  
4 The preliminary power calculations in the present study were based on expected change in  $\dot{V}O_{2peak}$  since  
5 no previous data on the potential effect of bicycling to school on cardiometabolic health were available.  
6  
7

### 8 9 **Compliance**

10 Participants did not exhibit a behavior that was fully in accordance to the group they were randomised into.  
11 During the intervention period five participants in the intervention group bicycled less than 80% of all  
12 possible trips to school, and one participant in the control group cycled more than 20% of all trips to school  
13 by bike. A relative cutoff value of 80% was set allowing room for participants to be included in the efficacy  
14 analyses though subject to sickness, bike theft and the like. This arbitrary relative cutoff was preferred to  
15 an absolute due to slightly varying study duration and coincides well with the frequency of bicycling  
16 observed in the underlying population. In the ITT analyses we maintained the strengths of the RCT-design  
17 and accounted for potential known and unknown confounding through inclusion of all allocated  
18 participants in the analyses knowing that the true health potential of bicycling to school is likely to be larger  
19 than our estimates. In supplementary efficacy analyses we accounted for the non-compliance and found  
20 slightly larger effect estimates for both composite Z score and  $\dot{V}O_{2peak}$ . We included “non-bicycling”  
21 participants based on self-reported mode of transportation to school. From the transport diaries it was  
22 possible to assess whether participants in the period preceding the study had in fact been non-bicycling and  
23 meeting inclusion criteria (as self-claimed). Four participants in the control group and one in the  
24 intervention unfortunately bicycled more than 20% of possible trips to school in the two weeks pre-  
25 baseline period. Participants were kept in both ITT and efficacy-analyses though their appearance possibly  
26 diluted the true effect of commuter bicycling to school. It is evident that acceptance and understanding of  
27 randomisation of transport to school was a challenge. Transport to school is an integrated part of the daily  
28 logistics of the entire family making compliance highly susceptible to various factors such as parental job  
29 situation, parental marital status and sudden extra vacation.  
30  
31  
32  
33  
34  
35  
36  
37  
38  
39  
40  
41  
42  
43  
44

### 45 **Strengths and weaknesses of the study**

46 The major strength of this study was the randomised design which through elimination of bias allowed for  
47 investigation of a causal relationship between bicycling to school and health outcomes. Compliance was  
48 supported by inclusion of participants from numerous classes consequently diminishing the risk of  
49 contamination between groups. Direct measurements of  $\dot{V}O_{2peak}$  and all baseline and follow-up  
50 measurements being carried out by the same experienced, and blinded test personnel are likewise study  
51 strengths. Furthermore detailed information on the degree of exposure before (allowing assessment of  
52 fulfillment of inclusion criteria) and during (e.g. mode of transportation to school, amount of bicycling to  
53  
54  
55  
56  
57  
58  
59  
60

1  
2  
3  
4 school, amount of bicycling beyond commuter bicycling, commuter bicycling intensity, general physical  
5 activity level) the study is advantageous. A study weakness was a relatively small study sample not  
6 behaving perfectly in accordance to the group randomised into, and consequently possible compromised  
7 the detection of an effect of bicycling to school on cardiorespiratory fitness. It is likely that the amount of  
8 total bicycling assessed from SMS-reported odometer status were underestimated because some  
9 odometers reset due to malfunction. Possible this underestimation is biased as the intervention group  
10 generally bicycled more trips and thus was more susceptible to theft and malfunction. This, however, is not  
11 crucial in the present study focusing on commuter bicycling being assessed from the transport diaries. Field  
12 measurements of commuter bicycling intensity and distance are based solely on one single trip to school  
13 and should therefore be taken with caution. Finally we cannot rule out that the field measurements have  
14 been biased due to the Hawthorne effect (i.e. children may have changed their behavior as they knew they  
15 were being studied). A possible Hawthorne effect should, however, beside from the field measurements be  
16 equal in the two study arms.  
17  
18  
19  
20  
21  
22  
23  
24  
25  
26

### 27 **Recruitment**

28 It was feasible to carry out the present study because it is relatively safe and feasible to bicycle to school in  
29 Denmark. The recruitment of participants, however, turned out to be rather difficult partly due to the fact  
30 that approximately 60% of children in the region already bicycled to school[9] and thus not includable.  
31 From the remaining 40% some lived too far away from the school to bicycle, while others lived so close that  
32 they preferred to continue walking. Others were unable or unwilling to have their daily transport dictated  
33 by a randomisation. The recruitment difficulties forced us to include participants living closer to the school  
34 than our pre-determined inclusion criteria of 2km. The inference of inclusion of children with short  
35 commuter distance is that the observed effect of the present study had greater external validity.  
36  
37  
38  
39  
40  
41  
42

### 43 **Exposure in the intervention group**

44 In the field test children bicycled to school at a self-chosen average intensity of 73.6% of maximal heart  
45 rate, which is similar to Finnish adults who commute at a relative intensity of approximately 73.5-  
46 78.6%[25]. The relative intensities for adult commuting were converted from %VO<sub>2</sub>peak to %maximal heart  
47 rate by means of the regression equation reported by Swain[26]. Interestingly, web-assessed distance to  
48 school was 2.27 km (SD = 1.55) in the intervention group, whereas GPS-assessed distance in the same  
49 group was 2.13 km (SD = 1.51) (p = 0.08). Thus, though needed to be investigated further, self-reported  
50 commuter distance in children seem to be valid with (SD delta variable = 0.34).  
51  
52  
53  
54  
55  
56  
57  
58  
59  
60

1  
2  
3  
4 Despite short school travelling distance, short study duration and non-perfect compliance among the  
5 participants included in our ITT-analyses, a significantly decrease in sum of Z score was found in the  
6 intervention group compared to the control group. Accelerometer measurements conducted midway in the  
7 study indicated that this decrease was not mediated through an increased level of general physical activity  
8 since neither mean count nor adjusted minutes at various intensity levels (the latter not included in the  
9 results section) were statistically significant different between groups. Our rationale for including children  
10 walking to school was based on previous studies reporting no significant differences in various measures of  
11 physical fitness between participants walking to school and those using passive transport[8,22].  
12  
13  
14  
15  
16  
17  
18

### 19 **Main message**

20 Though comparison of effect sizes should be done with caution[27] a lowering of the composite Z score by  
21 0.58 is substantial. In comparison an increase in continuous metabolic syndrome score of 1 has been  
22 associated with an odds ratio of developing type-2 diabetes mellitus of 3.4 and 5.1 in men and women,  
23 respectively, and odds ratio for cardiovascular disease of 1.7[28]. Consequently a lowering of metabolic  
24 syndrome score by 0.58 could theoretically lower the odds of developing diabetes about 45% and CVD  
25 around 25%.  
26  
27  
28  
29

30 In conclusion bicycling to school had positive effect on clustering of cardiometabolic risk factors in  
31 children and should thus be considered as effective prevention of diabetes and cardiovascular disease.  
32  
33  
34  
35  
36  
37  
38

### 39 **Figure legends:**

40  
41 Figure 1. Participants flow diagram  
42

43 Figure 2. Dose-response between bicycling to school and fitness improvement in the intervention group.  
44  
45  
46  
47  
48  
49  
50  
51  
52  
53  
54  
55  
56  
57  
58  
59  
60

**Acknowledgments**

We thank the participating children and parents and the Biomedical Laboratory Scientists.

**Contributors**

LØ designed the study, performed the randomisation, analysed and interpreted data, drafted the manuscript, and is guarantor. JT collected, analysed and interpreted the data and revised the manuscript. LAB revised the manuscript. LBA interpreted data and revised the manuscript. All authors approved the submitted version of the manuscript.

**Funding source**

The study was financed by Trygffonden and supported by the municipality of Odense. The study sponsors had no role in the study design, the collection, analysis, or interpretation of the data, the writing of the report, or the decision to submit the paper for publication. The corresponding author had full access to all the data in the study and had final responsibility to submit for publication.

**Competing interests**

All authors have completed the ICMJE uniform disclosure form at [www.icmje.org/coi\\_disclosure.pdf](http://www.icmje.org/coi_disclosure.pdf) (available on request from the corresponding author) and declare: no support from any organisation for the submitted work.

**Ethical approval**

The study was approved by the regional Ethics Committee. Written informed consent was obtained from the child's parent or legal guardian.

**Data sharing statement**

Data will not be publically accessible. However, interested individuals may contact the corresponding author.

**Licence for publication**

"The Corresponding Author has the right to grant on behalf of all authors and does grant on behalf of all authors, a worldwide licence to the Publishers and its licensees in perpetuity, in all forms, formats and media (whether known now or created in the future), to i) publish, reproduce, distribute, display and store the Contribution, ii) translate the Contribution into other languages, create adaptations, reprints, include within collections and create summaries, extracts and/or, abstracts of the Contribution, iii) create any other derivative work(s) based on the Contribution, iv) to exploit all subsidiary rights in the Contribution, v) the inclusion of electronic links from the Contribution to third party material where-ever it may be located; and, vi) licence any third party to do any or all of the above."



## REFERENCES

1. Grundy SM. Metabolic syndrome pandemic. *Arteriosclerosis, thrombosis, and vascular biology* 2008;28(4):629-36.
2. Weiss R, Dziura J, Burgert TS, Tamborlane WV, Taksali SE, Yeckel CW, et al. Obesity and the metabolic syndrome in children and adolescents. *The New England journal of medicine* 2004;350(23):2362-74.
3. Gami AS, Witt BJ, Howard DE, Erwin PJ, Gami LA, Somers VK, et al. Metabolic syndrome and risk of incident cardiovascular events and death: a systematic review and meta-analysis of longitudinal studies. *Journal of the American College of Cardiology* 2007;49(4):403-14.
4. Stern MP, Williams K, Gonzalez-Villalpando C, Hunt KJ, Haffner SM. Does the metabolic syndrome improve identification of individuals at risk of type 2 diabetes and/or cardiovascular disease? *Diabetes care* 2004;27(11):2676-81.
5. Camhi SM, Katzmarzyk PT. Tracking of cardiometabolic risk factor clustering from childhood to adulthood. *International journal of pediatric obesity : IJPO : an official journal of the International Association for the Study of Obesity* 2010;5(2):122-9.
6. Andersen LB, Harro M, Sardinha LB, Froberg K, Ekelund U, Brage S, et al. Physical activity and clustered cardiovascular risk in children: a cross-sectional study (The European Youth Heart Study). *Lancet* 2006;368(9532):299-304.
7. Ekelund U, Anderssen S, Andersen LB, Riddoch CJ, Sardinha LB, Luan J, et al. Prevalence and correlates of the metabolic syndrome in a population-based sample of European youth. *The American journal of clinical nutrition* 2009;89(1):90-6.
8. Cooper AR, Wedderkopp N, Wang H, Andersen LB, Froberg K, Page AS. Active travel to school and cardiovascular fitness in Danish children and adolescents. *Medicine and science in sports and exercise* 2006;38(10):1724-31.
9. Østergaard L, Grøntved A, Børrestad LA, Froberg K, Gravesen M, Andersen LB. Cycling to School Is Associated With Lower BMI and Lower Odds of Being Overweight or Obese in a Large Population-Based Study of Danish Adolescents. *Journal of physical activity & health* 2010.
10. Sattelmair J, Pertman J, Ding EL, Kohl HW, 3rd, Haskell W, Lee IM. Dose response between physical activity and risk of coronary heart disease: a meta-analysis. *Circulation* 2011;124(7):789-95.
11. Department\_For\_Transport. National Travel Survey: 2010. Accessed February 28 2012. <http://assets.dft.gov.uk/statistics/releases/national-travel-survey-2010/nts2010-01.pdf>.
12. Schulz KF, Grimes DA. Generation of allocation sequences in randomised trials: chance, not choice. *Lancet* 2002;359(9305):515-9.
13. Cole TJ, Bellizzi MC, Flegal KM, Dietz WH. Establishing a standard definition for child overweight and obesity worldwide: international survey. *BMJ* 2000;320(7244):1240-3.
14. Matthews DR, Hosker JP, Rudenski AS, Naylor BA, Treacher DF, Turner RC. Homeostasis model assessment: insulin resistance and beta-cell function from fasting plasma glucose and insulin concentrations in man. *Diabetologia* 1985;28(7):412-9.
15. Kolle E, Steene-Johannessen J, Andersen LB, Anderssen SA. Objectively assessed physical activity and aerobic fitness in a population-based sample of Norwegian 9- and 15-year-olds. *Scandinavian journal of medicine & science in sports* 2010;20(1):e41-7.
16. Trost SG, Loprinzi PD, Moore R, Pfeiffer KA. Comparison of accelerometer cut points for predicting activity intensity in youth. *Medicine and science in sports and exercise* 2011;43(7):1360-8.
17. Møller NC, Kristensen PL, Wedderkopp N, Andersen LB, Froberg K. Objectively measured habitual physical activity in 1997/1998 vs 2003/2004 in Danish children: the European Youth Heart Study. *Scandinavian journal of medicine & science in sports* 2009;19(1):19-29.
18. Twisk J, Proper K. Evaluation of the results of a randomized controlled trial: how to define changes between baseline and follow-up. *Journal of clinical epidemiology* 2004;57(3):223-8.

19. Pocock SJ. Clinical trials with multiple outcomes: a statistical perspective on their design, analysis, and interpretation. *Controlled clinical trials* 1997;18(6):530-45; discussion 46-9.
20. Eisenmann JC. On the use of a continuous metabolic syndrome score in pediatric research. *Cardiovascular diabetology* 2008;7:17.
21. Ford ES, Li C, Zhao G, Pearson WS, Mokdad AH. Prevalence of the metabolic syndrome among U.S. adolescents using the definition from the International Diabetes Federation. *Diabetes care* 2008;31(3):587-9.
22. Andersen LB, Lawlor DA, Cooper AR, Froberg K, Anderssen SA. Physical fitness in relation to transport to school in adolescents: the Danish youth and sports study. *Scandinavian journal of medicine & science in sports* 2009;19(3):406-11.
23. Cooper AR, Wedderkopp N, Jago R, Kristensen PL, Møller NC, Froberg K, et al. Longitudinal associations of cycling to school with adolescent fitness. *Preventive medicine* 2008;47(3):324-8.
24. Møller NC, Østergaard L, Gade JR, Nielsen JL, Andersen LB. The effect on cardiorespiratory fitness after an 8-week period of commuter cycling--a randomized controlled study in adults. *Preventive medicine* 2011;53(3):172-7.
25. Oja P MA, Heinonen A, Kukkonen-Harjula K, Laukkanen R, Pasanen M, Vuori I. Physiological effects of walking and cycling to work. *Scandinavian journal of medicine & science in sports* 1991(1):151-57.
26. Swain DP, Abernathy KS, Smith CS, Lee SJ, Bunn SA. Target heart rates for the development of cardiorespiratory fitness. *Medicine and science in sports and exercise* 1994;26(1):112-6.
27. McGough JJ, Faraone SV. Estimating the size of treatment effects: moving beyond p values. *Psychiatry (Edgmont)* 2009;6(10):21-9.
28. Hillier TA, Rousseau A, Lange C, Lepinay P, Cailleau M, Novak M, et al. Practical way to assess metabolic syndrome using a continuous score obtained from principal components analysis. *Diabetologia* 2006;49(7):1528-35.

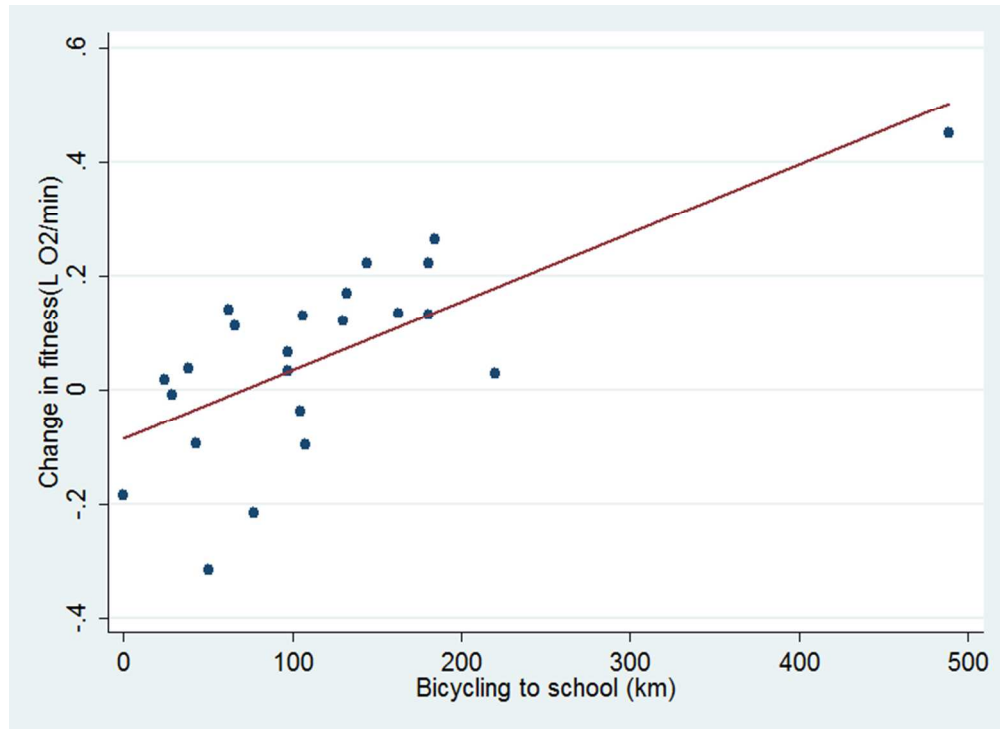

Figure 2. Dose-response between bicycling to school and fitness improvement in the intervention group  
281x204mm (72 x 72 DPI)

view only

1  
2  
3  
4  
5  
6  
7  
8  
9  
10  
11  
12  
13  
14  
15  
16  
17  
18  
19  
20  
21  
22  
23  
24  
25  
26  
27  
28  
29  
30  
31  
32  
33  
34  
35  
36  
37  
38  
39  
40  
41  
42  
43  
44  
45  
46  
47  
48  
49  
50  
51  
52  
53  
54  
55  
56  
57  
58  
59  
60

Table 1. Baseline characteristics in the intervention and control group by gender

| Bicycling group             | Boys (n=14) | Girls (n=9) | Total (n=23) |
|-----------------------------|-------------|-------------|--------------|
| Age (years)                 | 12.2 (0.9)  | 11.8 (0.7)  | 12.0 (0.8)   |
| Height (cm)                 | 152.4 (8.4) | 152.4 (4.7) | 152.4 (7.1)  |
| Weight (kg)                 | 44.2 (8.2)  | 44.0 (7.2)  | 44.1 (7.6)   |
| BMI (kg · m <sup>-2</sup> ) | 18.9 (2.1)  | 18.9 (2.4)  | 18.9 (2.2)   |
| Distance to school (km)     | 2.43 (1.75) | 1.95 (1.10) | 2.24 (1.52)  |
| Activity level (counts/min) | 661 (215)   | 477 (124)   | 589 (204)    |
| Control group               | Boys (n=12) | Girls (n=8) | Total (n=20) |
| Age (years)                 | 11.9 (0.8)  | 11.6 (0.7)  | 11.8 (0.8)   |
| Height (cm)                 | 150.3 (7.0) | 150.2 (6.6) | 150.3 (6.7)  |
| Weight (kg)                 | 41.0 (7.5)  | 42.1 (7.4)  | 41.5 (7.3)   |
| BMI (kg · m <sup>-2</sup> ) | 18.1 (2.4)  | 18.6 (2.5)  | 18.3 (2.4)   |
| Distance to school (km)     | 1.94 (1.52) | 4.4 (4.5)   | 2.9 (3.2)    |
| Activity level (counts/min) | 531 (124)   | 547 (122)   | 537 (121)    |

Data presented as mean and (SD) values

Table 2. Number of bicycling trips to and from school accomplished by participants in the intervention and the control group

| No. of trips | Bicycle group participants (n) | Control group participants (n) |
|--------------|--------------------------------|--------------------------------|
| 0            | 1                              | 17                             |
| 1-9          | 1                              | 1                              |
| 10-19        | 0                              | 1                              |
| 20-29        | 0                              | 0                              |
| 30-39        | 1                              | 1                              |
| 40-49        | 1                              | 0                              |
| 50-59        | 10                             | 0                              |
| 60-69        | 8                              | 0                              |
| 70-79        | 1                              | 0                              |
| Total        | 23                             | 20                             |

1  
2  
3  
4  
5  
6  
7  
8  
9  
10  
11  
12  
13  
14  
15  
16  
17  
18  
19  
20  
21  
22  
23  
24  
25  
26  
27  
28  
29  
30  
31  
32  
33  
34  
35  
36  
37  
38  
39  
40  
41  
42  
43  
44  
45  
46  
47  
48  
49  
50  
51  
52  
53  
54  
55  
56  
57  
58  
59  
60

Table 3. Absolute and relative bicycling intensity, speed and distance to school by gender in the entire intervention group (i.e. both compliant and non-compliant participants included)

|       | Average intensity<br>(bp/min) | Peak intensity<br>(bp/min) | Average intensity<br>(% of max HR) | Relative peak intensity<br>(% of max HR) | Average speed<br>(km/t) | School bicycling<br>(km) |
|-------|-------------------------------|----------------------------|------------------------------------|------------------------------------------|-------------------------|--------------------------|
| Boys  | 138.5 (15.8)                  | 164.4 (17.9)               | 72.0 (7.4)                         | 85.5 (8.7)                               | 13.1(3.4)               | 124.4 (119.5)            |
| Girls | 146.6 (17.3)                  | 171.9 (17.0)               | 75.2 (7.7)                         | 88.2 (7.1)                               | 13.9 (4.2)              | 109.7 (63.4)             |

Data presented as mean and (SD) values

Table 4. Measurements of risk factors at baseline and follow-up in the bicycling and the control group

|                                                          | Bicycling group |       |           |       |         | Control group |       |           |       |         |
|----------------------------------------------------------|-----------------|-------|-----------|-------|---------|---------------|-------|-----------|-------|---------|
|                                                          | Baseline        |       | Follow-up |       | p value | Baseline      |       | Follow-up |       | p value |
|                                                          | Mean            | SD    | Mean      | SD    |         | Mean          | SD    | Mean      | SD    |         |
| $\dot{V}O_2$ peak (L O <sub>2</sub> ·min <sup>-1</sup> ) | 1.81            | 0.42  | 1.87      | 0.38  | 0.1180  | 1.69          | 0.36  | 1.73      | 0.34  | 0.1413  |
| Systolic (mm Hg)                                         | 107.1           | 9.6   | 107.3     | 8.3   | 0.9188  | 105.0         | 8.7   | 107.6     | 8.7   | 0.2412  |
| Diastolic (mm Hg)                                        | 60.8            | 7.0   | 61.2      | 4.1   | 0.7909  | 58.0          | 4.7   | 62.2      | 6.1   | 0.0036  |
| BMI(kg·m <sup>-2</sup> )                                 | 18.9            | 2.2   | 19.1      | 2.3   | 0.0965  | 18.3          | 2.4   | 18.4      | 2.3   | 0.0427  |
| Sum of four skinfolds (mm)                               | 41.0            | 16.4  | 39.1      | 14.8  | 0.2057  | 36.3          | 15.5  | 37.6      | 15.6  | 0.2614  |
| Total cholesterol(mmol/L)                                | 3.93            | 0.63  | 4.16      | 0.60  | 0.0131  | 3.96          | 0.71  | 4.26      | 0.76  | 0.0023  |
| HDL cholesterol(mmol/L)                                  | 1.48            | 0.34  | 1.53      | 0.37  | 0.1713  | 1.36          | 0.24  | 1.42      | 0.23  | 0.1256  |
| LDL cholesterol(mmol/L)                                  | 2.20            | 0.61  | 2.27      | 0.57  | 0.2697  | 2.36          | 0.66  | 2.53      | 0.71  | 0.0379  |
| Triglycerides(mmol/L)                                    | 0.64            | 0.17  | 0.67      | 0.22  | 0.3293  | 0.70          | 0.25  | 0.77      | 0.23  | 0.1181  |
| Glucose(mmol/L)                                          | 5.35            | 0.26  | 5.48      | 0.44  | 0.1587  | 5.54          | 1.24  | 5.77      | 1.40  | 0.0036  |
| Insulin (pmol/L)                                         | 42.10           | 28.48 | 33.68     | 17.88 | 0.0450  | 32.74         | 10.16 | 39.21     | 20.48 | 0.0971  |
| HOMA score                                               | 1.70            | 1.25  | 1.41      | 0.85  | 0.1197  | 1.28          | 0.43  | 1.60      | 0.87  | 0.0622  |
| Total cholesterol/HDL-ratio                              | 2.75            | 0.53  | 2.82      | 0.58  | 0.2610  | 2.96          | 0.54  | 3.04      | 0.61  | 0.3363  |
| Activity level (counts/min)                              | 586             | 208   | 596       | 205   | 0.6668  | 537           | 120   | 577       | 184   | 0.3304  |
| Standardised composite Z score                           | 0.01            | 1.02  | -0.26     | 1.32  | 0.0841  | 0.01          | 1.01  | 0.28      | 1.12  | 0.1081  |

1  
2  
3  
4  
5  
6  
7  
8  
9  
10  
11  
12  
13  
14  
15  
16  
17  
18  
19  
20  
21  
22  
23  
24  
25  
26  
27  
28  
29  
30  
31  
32  
33  
34  
35  
36  
37  
38  
39  
40  
41  
42  
43  
44  
45  
46  
47  
48  
49

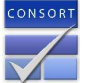

# CONSORT 2010 checklist of information to include when reporting a randomised trial\*

| Section/Topic                    | Item No | Checklist item                                                                                                                                                                              | Reported on page No |
|----------------------------------|---------|---------------------------------------------------------------------------------------------------------------------------------------------------------------------------------------------|---------------------|
| <b>Title and abstract</b>        |         |                                                                                                                                                                                             |                     |
|                                  | 1a      | Identification as a randomised trial in the title                                                                                                                                           | 1                   |
|                                  | 1b      | Structured summary of trial design, methods, results, and conclusions (for specific guidance see CONSORT for abstracts)                                                                     | 2                   |
| <b>Introduction</b>              |         |                                                                                                                                                                                             |                     |
| Background and objectives        | 2a      | Scientific background and explanation of rationale                                                                                                                                          | 4                   |
|                                  | 2b      | Specific objectives or hypotheses                                                                                                                                                           | 4                   |
| <b>Methods</b>                   |         |                                                                                                                                                                                             |                     |
| Trial design                     | 3a      | Description of trial design (such as parallel, factorial) including allocation ratio                                                                                                        | 5                   |
|                                  | 3b      | Important changes to methods after trial commencement (such as eligibility criteria), with reasons                                                                                          | 13                  |
| Participants                     | 4a      | Eligibility criteria for participants                                                                                                                                                       | 5                   |
|                                  | 4b      | Settings and locations where the data were collected                                                                                                                                        | 5                   |
| Interventions                    | 5       | The interventions for each group with sufficient details to allow replication, including how and when they were actually administered                                                       | 5                   |
| Outcomes                         | 6a      | Completely defined pre-specified primary and secondary outcome measures, including how and when they were assessed                                                                          | 5                   |
|                                  | 6b      | Any changes to trial outcomes after the trial commenced, with reasons                                                                                                                       |                     |
| Sample size                      | 7a      | How sample size was determined                                                                                                                                                              | 9                   |
|                                  | 7b      | When applicable, explanation of any interim analyses and stopping guidelines                                                                                                                |                     |
| <b>Randomisation:</b>            |         |                                                                                                                                                                                             |                     |
| Sequence generation              | 8a      | Method used to generate the random allocation sequence                                                                                                                                      | 5                   |
|                                  | 8b      | Type of randomisation; details of any restriction (such as blocking and block size)                                                                                                         | 5                   |
| Allocation concealment mechanism | 9       | Mechanism used to implement the random allocation sequence (such as sequentially numbered containers), describing any steps taken to conceal the sequence until interventions were assigned | 5                   |
| Implementation                   | 10      | Who generated the random allocation sequence, who enrolled participants, and who assigned participants to interventions                                                                     | 15                  |
| Blinding                         | 11a     | If done, who was blinded after assignment to interventions (for example, participants, care providers, those                                                                                | 5+12                |



|    |                          |                                                                                                                     |            |
|----|--------------------------|---------------------------------------------------------------------------------------------------------------------|------------|
| 1  |                          |                                                                                                                     |            |
| 2  |                          | assessing outcomes) and how                                                                                         |            |
| 3  |                          |                                                                                                                     |            |
| 4  |                          | 11b If relevant, description of the similarity of interventions                                                     |            |
| 5  | Statistical methods      | 12a Statistical methods used to compare groups for primary and secondary outcomes                                   | 8          |
| 6  |                          | 12b Methods for additional analyses, such as subgroup analyses and adjusted analyses                                | 8          |
| 7  |                          |                                                                                                                     |            |
| 8  | <b>Results</b>           |                                                                                                                     |            |
| 9  | Participant flow (a      | 13a For each group, the numbers of participants who were randomly assigned, received intended treatment, and        | 5+figure 1 |
| 10 | diagram is strongly      | were analysed for the primary outcome                                                                               |            |
| 11 | recommended)             | 13b For each group, losses and exclusions after randomisation, together with reasons                                | 5          |
| 12 | Recruitment              | 14a Dates defining the periods of recruitment and follow-up                                                         | 5          |
| 13 |                          | 14b Why the trial ended or was stopped                                                                              |            |
| 14 |                          |                                                                                                                     |            |
| 15 | Baseline data            | 15 A table showing baseline demographic and clinical characteristics for each group                                 | Table 1    |
| 16 | Numbers analysed         | 16 For each group, number of participants (denominator) included in each analysis and whether the analysis was      | 12         |
| 17 |                          | by original assigned groups                                                                                         |            |
| 18 |                          |                                                                                                                     |            |
| 19 | Outcomes and             | 17a For each primary and secondary outcome, results for each group, and the estimated effect size and its           | 10         |
| 20 | estimation               | precision (such as 95% confidence interval)                                                                         |            |
| 21 |                          | 17b For binary outcomes, presentation of both absolute and relative effect sizes is recommended                     |            |
| 22 | Ancillary analyses       | 18 Results of any other analyses performed, including subgroup analyses and adjusted analyses, distinguishing       | 10         |
| 23 |                          | pre-specified from exploratory                                                                                      |            |
| 24 |                          |                                                                                                                     |            |
| 25 | Harms                    | 19 All important harms or unintended effects in each group (for specific guidance see CONSORT for harms)            |            |
| 26 |                          |                                                                                                                     |            |
| 27 | <b>Discussion</b>        |                                                                                                                     |            |
| 28 | Limitations              | 20 Trial limitations, addressing sources of potential bias, imprecision, and, if relevant, multiplicity of analyses | 12         |
| 29 | Generalisability         | 21 Generalisability (external validity, applicability) of the trial findings                                        | 13         |
| 30 | Interpretation           | 22 Interpretation consistent with results, balancing benefits and harms, and considering other relevant evidence    | 14         |
| 31 |                          |                                                                                                                     |            |
| 32 | <b>Other information</b> |                                                                                                                     |            |
| 33 | Registration             | 23 Registration number and name of trial registry                                                                   | 5          |
| 34 | Protocol                 | 24 Where the full trial protocol can be accessed, if available                                                      |            |
| 35 | Funding                  | 25 Sources of funding and other support (such as supply of drugs), role of funders                                  | 15         |
| 36 |                          |                                                                                                                     |            |

37

38 \*We strongly recommend reading this statement in conjunction with the CONSORT 2010 Explanation and Elaboration for important clarifications on all the items. If relevant, we also

39 recommend reading CONSORT extensions for cluster randomised trials, non-inferiority and equivalence trials, non-pharmacological treatments, herbal interventions, and pragmatic trials.

40 Additional extensions are forthcoming: for those and for up to date references relevant to this checklist, see [www.consort-statement.org](http://www.consort-statement.org).

41

42

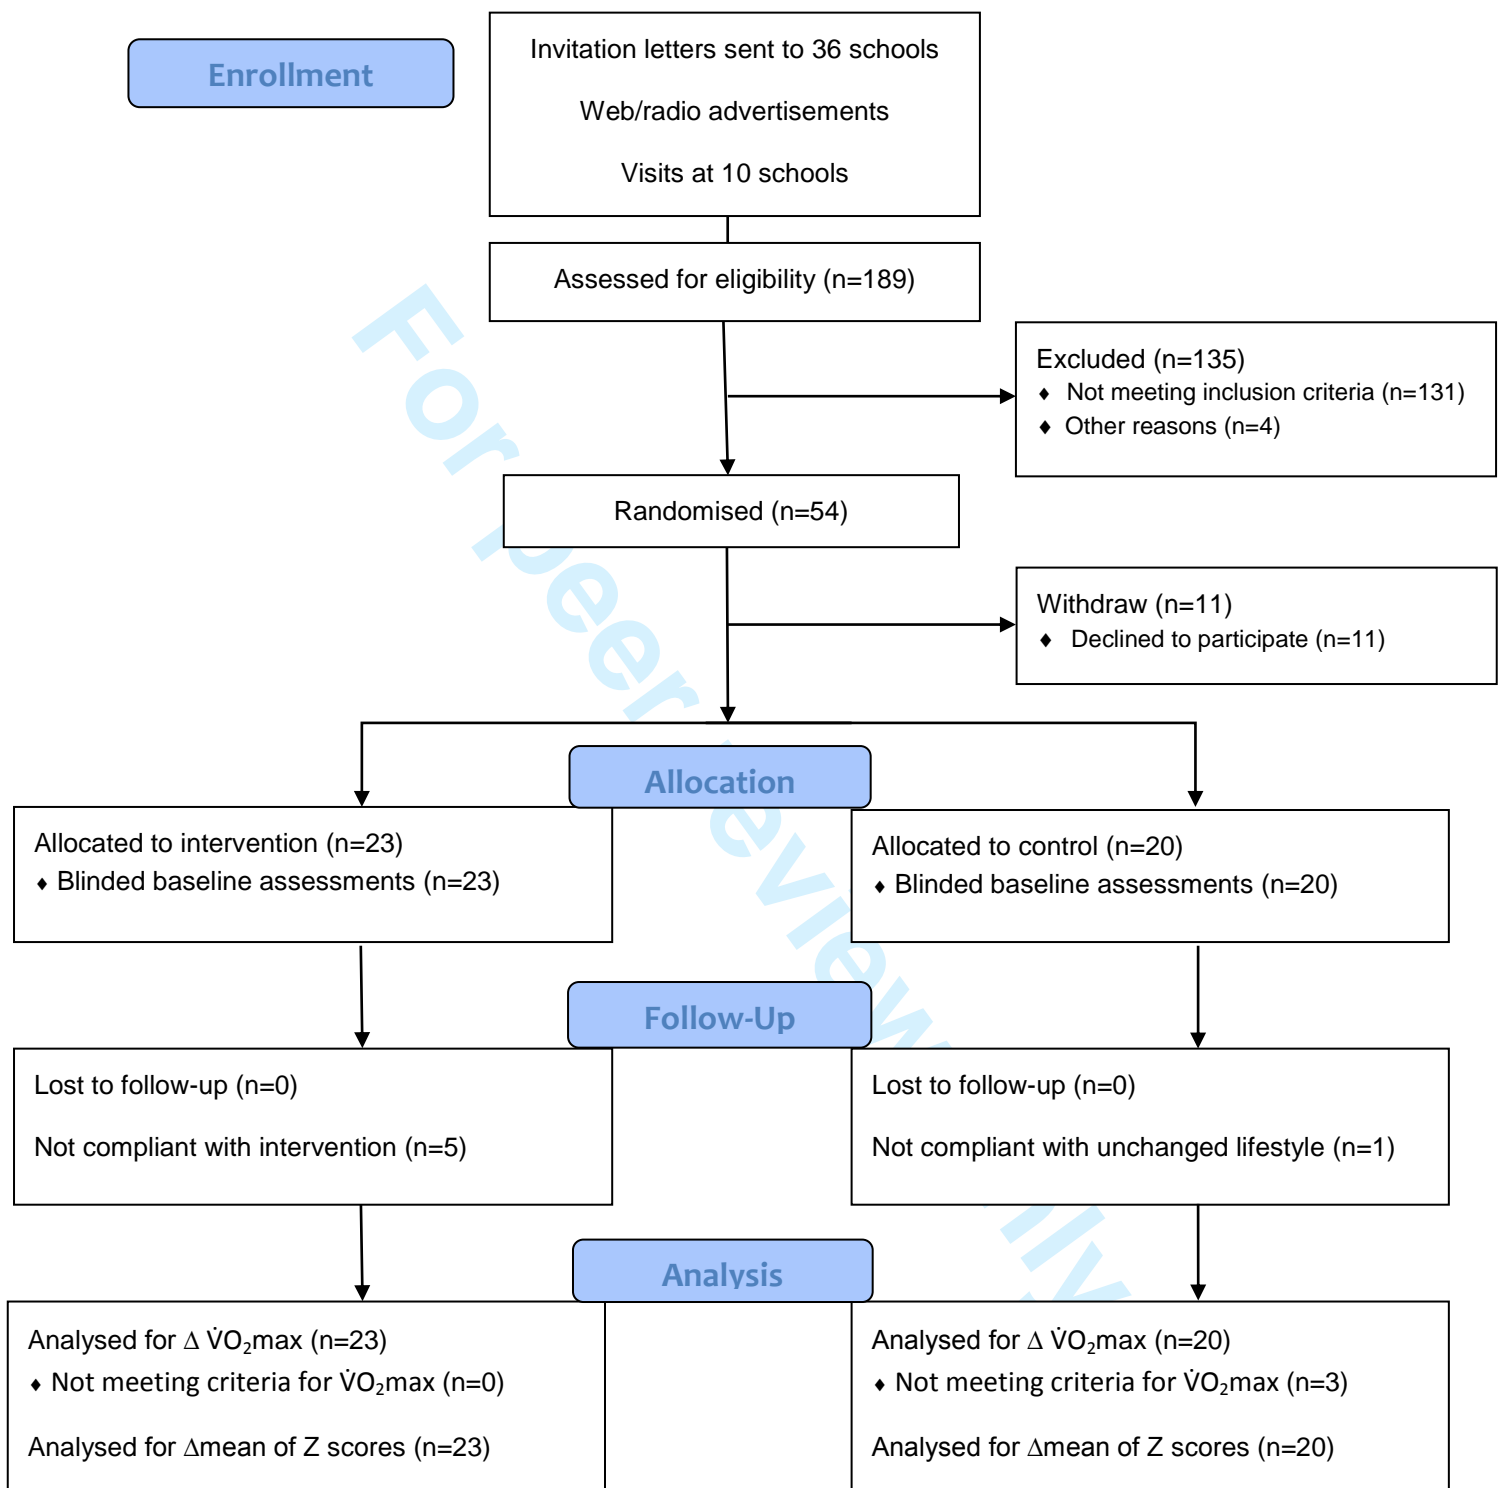

Figure 1

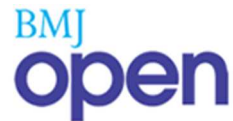

**Bicycling to school improves the cardiometabolic risk factor profile: a randomised controlled trial**

|                                 |                                                                                                                                                                                                                                                                                                                                                                                                                                  |
|---------------------------------|----------------------------------------------------------------------------------------------------------------------------------------------------------------------------------------------------------------------------------------------------------------------------------------------------------------------------------------------------------------------------------------------------------------------------------|
| Journal:                        | <i>BMJ Open</i>                                                                                                                                                                                                                                                                                                                                                                                                                  |
| Manuscript ID:                  | bmjopen-2012-001307.R1                                                                                                                                                                                                                                                                                                                                                                                                           |
| Article Type:                   | Research                                                                                                                                                                                                                                                                                                                                                                                                                         |
| Date Submitted by the Author:   | 04-Sep-2012                                                                                                                                                                                                                                                                                                                                                                                                                      |
| Complete List of Authors:       | Østergaard, Lars; University of Southern Denmark, Institute of Sports Science and Clinical Biomechanics<br>Børrestad, Line; University of Southern Denmark, Institute of Sports Science and Clinical Biomechanics<br>Tarp, Jakob; University of Southern Denmark, Institute of Sports Science and Clinical Biomechanics<br>Andersen, Lars; University of Southern Denmark, Institute of Sports Science and Clinical Biomechanics |
| <b>Primary Subject Heading</b>: | Public health                                                                                                                                                                                                                                                                                                                                                                                                                    |
| Secondary Subject Heading:      | Epidemiology, Sports and exercise medicine, Cardiovascular medicine                                                                                                                                                                                                                                                                                                                                                              |
| Keywords:                       | cardiometabolic, risk factors, bicycling, children, commuting                                                                                                                                                                                                                                                                                                                                                                    |
|                                 |                                                                                                                                                                                                                                                                                                                                                                                                                                  |

SCHOLARONE™  
Manuscripts

## TITLE PAGE

**Bicycling to school improves the cardiometabolic risk factor profile: a randomised controlled trial**

Lars Østergaard<sup>1</sup>, Line A B Børrestad<sup>1,2</sup>, Jakob Tarp<sup>1</sup>, Lars Bo Andersen<sup>1,3</sup>

<sup>1</sup>Center for Research in Childhood Health, Institute of Sports Science and Clinical Biomechanics, University of Southern Denmark, Odense (5230), Denmark

<sup>2</sup>Institute of Public Health, Sport and Nutrition, Faculty of Health and Sport, University of Agder, Kristiansand (4604), Norway

<sup>3</sup>Department of Sports Medicine, Norwegian School of Sport Sciences, Oslo (0863), Norway.

Correspondence to: [lostergaard@health.sdu.dk](mailto:lostergaard@health.sdu.dk)

Keywords: cardiometabolic, risk factors, bicycling, children, commuting

Word count: Abstract: 199, Main text: 4.343

**ABSTRACT****Objectives:**

To investigate whether bicycling to school improve cardiometabolic risk factor profile and cardiorespiratory fitness among children.

**Design:**

Prospective, blinded, randomised controlled trial.

**Setting:**

Single centre study in Odense, Denmark.

**Participants:**

43 children previously not bicycling to school were randomly allocated to control group (n=20) (i.e. no change in lifestyle) or intervention group (i.e. bicycling to school) (n=23).

**Primary and secondary outcome measures:**

Change in cardiometabolic risk factor score and change in cardiorespiratory fitness.

**Results:**

All participants measured at baseline returned at follow-up. Based upon intention to treat analyses, clustering of cardiometabolic risk factors was lowered by 0.58 SD (95% CI -1.03 to -0.14, p= 0.012) in the bicycling group compared to the control group. Cardiorespiratory fitness ( $L O_2 \cdot \text{min}^{-1}$ ) per se did not increase significantly more in the intervention than in the control group (beta = 0.0337, 95% CI -0.06 to 0.12, p=0.458).

**Conclusions:**

Bicycling to school counteracted a clustering of cardiometabolic risk factors and should thus be recognized as potential prevention of type 2 diabetes mellitus and cardiovascular disease. The intervention did, however, not elicit a larger increase in cardiorespiratory fitness in the intervention group as compared to the control group.

**Trial registration:**

Registered at [www.clinicaltrials.gov](http://www.clinicaltrials.gov) (NCT01236222)

**ARTICLE SUMMARY****Article focus**

- Intervention studies investigating whether bicycling to school in fact cause improved cardiometabolic health have not yet been carried out.
- The aim of this study was to investigate whether bicycling to school cause an increase in cardiorespiratory fitness and induce improvement of clustering of cardiometabolic risk factors

**Key messages**

- This study is the first study to document that bicycling to school had positive effect on clustering of cardiometabolic risk factors in children.

**Strengths and Limitations**

- The major strength of this study was the randomised design which through elimination of bias allowed for investigation of a causal relationship between bicycling to school and health outcomes.
- Relatively weak statistical power and impossibility of blindness of the treatment.

## INTRODUCTION

The metabolic syndrome (MS) is the concurrence of multiple risk factors associated with cardiovascular disease and type 2 diabetes mellitus. Prevalence is between 20-30% of the adult population in most countries[1], and a rising incidence in children and adolescents[2], indicates that the condition represents a major threat to global public health. Exposure of the MS confers a doubled risk of incident cardiovascular event and death[3] and up to 5-times higher risk of developing type 2 diabetes mellitus in adults[4]. Furthermore, since clustering of cardiometabolic risk factors track from childhood to adulthood[5] early prevention of the MS is important in order to prevent occurrence of disease later in life.

In children and adolescents physical activity has the potential to prevent a clustering of risk factors[6], underpinned by the notion that an increase of daily moderate physical activity by 10-20% is associated with 33% lower risk of having the MS[7].

Active commuting such as walking and bicycling to school might be important contributors of preventive physical activity. Observational studies indicate that bicycling to school is beneficial to health since higher cardiorespiratory fitness[8] and lower BMI[9] have been observed in children bicycling to school compared to non-cyclists. If bicycling to school is generally acknowledged as a time-efficient and feasible form of daily physical activity it could potentially target the entire population. From a public health perspective this would be very appealing considering that the greatest health benefits are achieved in the least active individuals [10].

There seems to be wide-ranging scepticism about the opportunity to bicycle to school in industrialized societies. The level of concern, however seems often to be negatively associated with the prevalence of bicycling to school, which in Denmark for instance is about 60% among adolescents [8,9] whereas in the UK approximately 2% bicycle to school [11].

Intervention studies investigating whether bicycling to school in fact cause improved cardiometabolic health have not yet been carried out. One reason for this could be that very few countries have an infrastructure allowing safe commuting by bike to school. Another reason could be that interventions often include change in the built environment in order to provide safe routes and this is difficult to control in a rigid study design.

The evidence linking bicycle commuting with cardiometabolic health in children is still limited and experimental studies investigating causality have been requested [12]. Hence, the aim of this study is to investigate, in a randomised trial, whether bicycling to school cause an increase in cardiorespiratory fitness and induce improvement of clustering of cardiometabolic risk factors.

## METHODS

### Study participants

This study took place in Denmark in the municipality of Odense during spring 2011. Participants were recruited through invitation letters sent to 36 elementary public schools in the municipality of Odense. Investigators then visited 10 of these schools (approximately 92 classes) and presented the project. Additionally, the project was presented online and in a radio spot. Participants were included if they at the time of registration stated that they had not bicycled regularly to and from school for at least 3 months (i.e. at least from January onwards) prior to the intervention, and if willing to be randomised to one of the two study groups (i.e. control group or bicycling group). Reasons for exclusion were not having a bike, and/or affirming less than one km between home and school. One hundred and eighty-nine children volunteered to participate in the study. One hundred and thirty-one of these, however, claimed that they bicycled regularly to school, and four withdrew from the study due to a changed family situation. Fifty-four eligible children were subsequently randomised to either control or intervention. After randomisation six and five participants from control and intervention group, respectively, withdrew since they did not accept being randomized, leaving 43 participants in the study (Figure 1). Written informed consent was obtained from the child's parent or legal guardian after they were given a detailed written explanation of the aims of the study, possible hazards, discomfort, and inconvenience, and the option to withdraw at any time. The study was approved by the regional Ethics Committee (S-20100009) and registered at [clinicaltrials.gov](http://clinicaltrials.gov) (NCT01236222) with the purpose of investigating the effect of bicycling to school on the metabolic syndrome and aerobic fitness.

### Study design and intervention

Participants were randomly assigned to a control group (i.e. no change in lifestyle) or to an experimental group (i.e. commuter bicycling). A permuted random block size (2, 4 and 6) randomisation ([www.randomization.com](http://www.randomization.com)) was used in order to reduce the chances of the assignment schedule being seen by those responsible for recruitment of participants[13]. Twenty participants were allocated to the control group and 23 participants to the bicycling group. All measurements were repeated at the conclusion of the 8-week intervention program. There were no restrictions beside the mode of transportation to school. The study period comprised one week of national holiday and additionally two bank holidays where no children attended school. Matching baseline test date with follow-up test (in order to achieve similar intervention duration between subjects) was strived for, but logistically not possible for all participants. This has implications on the amount of exposure the intervention group was able to accumulate. Participants could maximally accumulate between 56 and 74 trips to and from school during



1  
2  
3  
4 the study period. All measurements at baseline and follow-up were conducted by personal blinded to group  
5 allocation. Children were picked up and returned to their home addresses when scheduled for baseline and  
6 follow-up tests.  
7  
8

### 9 10 **Measurements**

11 Height was measured by a stadiometer (SECA, Hamburg, Germany), children wearing socks or bare feet and  
12 weight was assessed by a 0.1 kg precision scale (Soehnle Professional, Murrhardt, Germany) wearing only  
13 shorts and t-shirts. Skinfold thickness was measured on the left side with a Harpenden caliper (John Bull,  
14 British Indicators Ltd., West Sussex, England) at the biceps, triceps, subcapsular, and suprailiac sites.  
15 Overweight/obesity status was defined according to age- and gender specific published cut-points for  
16 BMI[14].  
17  
18

19 Systolic and diastolic blood pressure was measured by a sphygmomanometer (DINAMAP ProCare  
20 100, General electric, USA). At least five measurements were made on the left arm with two min interval  
21 and the mean of the final three measurements were used as systolic and diastolic pressure.  
22  
23

24 All Children were instructed to fast overnight (>8 hours), and only allowed to drink water until the  
25 blood sample was drawn. Blood was drawn from the right fossa cubitus by a biomedical laboratory  
26 scientist. If a participant had not been fasting or if he/she had experienced any illness during the last week,  
27 a new test day was scheduled for that child. Samples were analysed for: Glucose, insulin, cholesterol,  
28 triglyceride. Insulin resistance was estimated according to the homoeostasis model assessment (HOMA) as  
29 the product of fasting glucose (mmol/L) and insulin ( $\mu\text{U}/\text{mL}$ ) divided by the constant 22.5[15]. Breakfast  
30 was served on site subsequent of blood sampling. All analysis of the blood specimens were conducted at  
31 Department of Clinical Biochemistry and Pharmacology, Odense Universityhospital  
32  
33

34 Aerobic fitness ( $\dot{V}\text{O}_2\text{peak}$ ) was determined in a progressive bicycle test with on an electronically  
35 braked ergometer (Monark 839 Ergomedic, Varberg, Sweden). Pulmonary gas exchange was measured with  
36 a metabolic cart (Amis2001, Innovision, Denmark) with 15 seconds epoch, and the highest value within 30  
37 seconds was regarded as a maximal if respiratory exchange ratio (RER)  $\geq 0.99$  or maximal heart rate (HR)  
38 was  $\geq 185$  beats/min, and the test leader judged the participant to show signs of intense effort (e.g. facial  
39 flushing or difficulties in keeping up the pedal frequency)[16]. HR was measured with a HRM (Polar  
40 RS800CX, Kempele, Finland) with epoch set to 1 sec. Children were thoroughly explained the purpose of the  
41 test and that it would require a maximal effort. After a warm-up period of 5 minutes at 40W, work-load  
42 was increased 40W every 2 minutes until volitional exertion. Verbal encouragement was given throughout  
43 the test and recommended pedaling cadence was 60-80 rpm.  
44  
45  
46  
47  
48  
49  
50  
51  
52  
53  
54  
55  
56  
57  
58  
59  
60

1  
2  
3  
4 Children completed a general questionnaire regarding transportation to school, sports-habits, and  
5 general quality of life. At follow up all children marked their route to school using a web-based map tool  
6 ([www.loebererute.dk](http://www.loebererute.dk)).  
7

8  
9 All children had their bike equipped with an odometer on average two weeks before baseline  
10 measurement. The odometers were individually calibrated in accordance to wheel circumference.  
11 Odometer levels were self-reported, by participants in both groups, every Sunday until tested at follow-up  
12 by means of a commercial SMS system (SMS-Track ApS). Participants who did not answer Sunday were  
13 contacted Monday. Malfunctioning odometers were replaced within a few days.  
14

15  
16 Both groups were instructed to report daily mode of school transportation on a custom made  
17 transport diary. Total mileage of school related bicycling during the study was calculated from the distance  
18 to school (web route assessment) times the number of trips to/from school (transport diary).  
19

20  
21 Field measurement of intensity of bicycling to school was carried out midway (five weeks after baseline).  
22 Participants in the intervention group received a GPS (Qstarz BT-Q1300S, Qstarz International Inc., Taiwan)  
23 and a heart rate monitor (HRM) (PolarTeam<sup>2</sup>, Polar, Kempele, Finland) and were instructed to wear the  
24 devices during one day. Both GPS and HRM were set at an epoch of 5 second. All GPS data were transferred  
25 to commercial software (Travel recorder v. 5.0) and corrected for drift using manufacturer software. The  
26 GPS was the reference for all HRM data. Mean HR of school transportation, if verified by the diary, was  
27 calculated as the mean of the measurements from the first data point when the child exceeded a speed of  
28 5 km/h when leaving home, to the last data point above 5 km/h when the child arrived at school. Both  
29 compliant and non-compliant participants were included in the determination of commuter bicycling  
30 intensity since the primary outcome is based on intention to treat (ITT) analyses.  
31

32  
33 Physical activity beyond bicycling was assessed with an accelerometer (Actigraph GT3X,  
34 Manufacturing Technology Inc, Fort Walton Beach, FL, USA). Physical activity was monitored for 7  
35 consecutive days from Monday to Sunday at baseline and midway (five weeks after baseline). Instruments  
36 were attached at the hip, and counts were sampled every two seconds. Data reduction was performed with  
37 customised software (Propero, Odense, Denmark). Only data from the vertical axis was included in the data  
38 analyses. Criteria for a successful recording were a minimum of 3 days of 10 h recording per day. Time  
39 periods of at least 30 consecutive minutes of zero counts were deemed to represent periods when the  
40 monitor was not worn and thus disregarded. Cut points for intensity levels were based on the  
41 Freedson/Trost equation[17]. Since cutpoints for physical activity intensity are specifically designed for 1  
42 min epoch these were divided by 30. The average time the accelerometer was worn was 13.5 and 13.6 h  
43 per day at baseline and follow up, respectively, and the number of minutes spent in the different intensity  
44  
45  
46  
47  
48  
49  
50  
51  
52  
53  
54  
55  
56  
57  
58  
59  
60

1  
2  
3  
4 intervals was proportionally adjusted to 14 h with the following equation: adjusted minutes=(observed in  
5 interval) $\times$ (14 $\times$ 60/total minutes) [18].  
6

7 Values for all blood parameters at both baseline and follow-up are missing in one participant from  
8 the intervention group due to needle phobia. Insulin and HOMA values were regarded as missing for one  
9 participant in the control group due to type 1-diabetes. Follow up cholesterol for one person and baseline  
10 HOMA for another participant from the intervention group were not obtained due to irregularity at the  
11 laboratory. Systolic blood pressure is missing in one participant due to resistance.  
12  
13  
14

15 One participant from the intervention group performed maximal tests, but was not measured with  
16 the metabolic cart.  $\dot{V}O_{2peak}$  was in this case estimated from the regression equation between power  
17 output (MPO) and  $\dot{V}O_{2peak}$  of the study sample. Change in  $\dot{V}O_{2peak}$  was considered missing in 3  
18 participants since test criteria was not met at follow-up.  
19  
20  
21  
22

### 23 **Statistics**

24 Crude baseline measurements were compared between the bicycling and the control group participants  
25 using unpaired mean comparison tests (t-tests), whereas paired t-tests were used in within group  
26 comparisons from baseline to follow-up.  
27  
28  
29

30 Post intervention values were analysed across the two groups using analysis of co-variance  
31 (ANCOVA), as suggested by Twisk and Proper[19], with participants grouped as originally randomised  
32 regardless of the degree of intervention compliance and types of activity actually performed. In efficacy  
33 analyses participants are referred to as compliant in the intervention group if at least 80% of possible trips  
34 to school were by bike on contrast participants in the control group are considered compliant if less than  
35 20% of possible trips were by bike. Change in outcome was compared between the bicycling and the  
36 control group with adjustment for baseline measure and gender. All covariates were selected a priori and  
37 thus in any case kept in the statistical modeling even if non-significant. Regression analyses were preceded  
38 by verification of fulfillment of parametric assumptions by qq-plots and Shapiro Wilks tests.  
39  
40  
41  
42  
43  
44

45 Z scores (observed value - baseline mean / baseline SD) were computed for each of the variables  
46 included in the composite Z score. A high Z score value (or an increase) is considered to have adverse health  
47 effects for all variables included in the composite score with exception of cardiorespiratory fitness where  
48 inverse values were calculated. Composite Z scores, based on baseline and follow-up measurements, were  
49 constructed as a mean of the available standardised selected risk factors (fasting triglyceride, insulin  
50 sensitivity (HOMA), sum of four skinfolds, systolic blood pressure, total cholesterol/HDL ratio and inverse  
51 aerobic fitness). Composite baseline and follow-up Z scores were then standardised according to the  
52 baseline mean and SD allowing for interpretation of change in composite Z score. Subsequently the change  
53  
54  
55  
56  
57  
58  
59  
60

in standardised composite Z score was calculated as (standardised mean of Z scores at follow up - standardised mean of Z scores at baseline).

Assuming a mean change of 10% in  $\dot{V}O_{2peak}$  and a SD of change of 0.3 L O<sub>2</sub> min<sup>-1</sup> the study needed 21 participants in both groups to be powered at 80%. All analyses were conducted using STATA IC version 11.0 (STATA Corp, College station) with alpha=0.05.

## RESULTS

### Background characteristics

Of the 54 participants randomized, 11 declined to participate (two due to moving, one due to personal reasons, one due to parental job situation, two due to test methods and five not accepting randomisation) leaving 43 participants (79.6%) in the study. No subjects experienced accidents or other harms. All 43 participants were measured at baseline and returned for follow-up (Fig. 1). Based on published age and gender BMI cut-off values [14] no participants were obese at baseline, whereas three and two participants were overweight in the bicycling and control group, respectively. There were no statistical differences between the control group and the bicycling group participants who completed the 8-week intervention period on any of the baseline features presented in Table 1, nor was there any baseline difference in the two primary dependent variables:  $\dot{V}O_{2peak}$  and mean of Z scores.

Table 1. Baseline characteristics in the intervention and control group by gender

| Bicycling group             | Boys (n=14) | Girls (n=9) | Total (n=23) |
|-----------------------------|-------------|-------------|--------------|
| Age (years)                 | 12.2 (0.9)  | 11.8 (0.7)  | 12.0 (0.8)   |
| Height (cm)                 | 152.4 (8.4) | 152.4 (4.7) | 152.4 (7.1)  |
| Weight (kg)                 | 44.2 (8.2)  | 44.0 (7.2)  | 44.1 (7.6)   |
| BMI (kg · m <sup>-2</sup> ) | 18.9 (2.1)  | 18.9 (2.4)  | 18.9 (2.2)   |
| Distance to school (km)     | 2.43 (1.75) | 1.95 (1.10) | 2.24 (1.52)  |
| Activity level (counts/min) | 661 (215)   | 477 (124)   | 589 (204)    |
| Control group               | Boys (n=12) | Girls (n=8) | Total (n=20) |
| Age (years)                 | 11.9 (0.8)  | 11.6 (0.7)  | 11.8 (0.8)   |
| Height (cm)                 | 150.3 (7.0) | 150.2 (6.6) | 150.3 (6.7)  |
| Weight (kg)                 | 41.0 (7.5)  | 42.1 (7.4)  | 41.5 (7.3)   |
| BMI (kg · m <sup>-2</sup> ) | 18.1 (2.4)  | 18.6 (2.5)  | 18.3 (2.4)   |
| Distance to school (km)     | 1.94 (1.52) | 4.4 (4.5)   | 2.9 (3.2)    |
| Activity level (counts/min) | 531 (124)   | 547 (122)   | 537 (121)    |

Data presented as mean and (SD) values

### Adherence

All of the 43 allocated participants were available at follow-up assessments. Five participants in the intervention group and one in the control group were defined as non-compliant. The average compliance was 96.2% and 84.2 % in the control and the intervention group, respectively.

Table 2. Number of bicycling trips to and from school accomplished by participants in the intervention and the control group

| No. of trips | Bicycle group participants (n) | Control group participants (n) |
|--------------|--------------------------------|--------------------------------|
| 0            | 1                              | 17                             |
| 1-9          | 1                              | 1                              |
| 10-19        | 0                              | 1                              |
| 20-29        | 0                              | 0                              |
| 30-39        | 1                              | 1                              |
| 40-49        | 1                              | 0                              |
| 50-59        | 10                             | 0                              |
| 60-69        | 8                              | 0                              |
| 70-79        | 1                              | 0                              |
| Total        | 23                             | 20                             |

Table 3. Absolute and relative bicycling intensity, speed and distance to school by gender in the entire intervention group (i.e. both compliant and non-compliant participants included)

|       | Average intensity<br>(bp/min) | Peak intensity<br>(bp/min) | Average intensity<br>(% of max HR) | Relative peak intensity<br>(% of max HR) | Average speed<br>(km/t) | School bicycling<br>(km) |
|-------|-------------------------------|----------------------------|------------------------------------|------------------------------------------|-------------------------|--------------------------|
| Boys  | 138.5 (15.8)                  | 164.4 (17.9)               | 72.0 (7.4)                         | 85.5 (8.7)                               | 13.1(3.4)               | 124.4 (119.5)            |
| Girls | 146.6 (17.3)                  | 171.9 (17.0)               | 75.2 (7.7)                         | 88.2 (7.1)                               | 13.9 (4.2)              | 109.7 (63.4)             |

Data presented as mean and (SD) values

#### Change in $\dot{V}O_2$ peak from baseline to follow-up

Crude comparisons of the effects within groups showed that  $\dot{V}O_2$  peak mean increased from 1.81 at baseline to 1.87 L O<sub>2</sub> min<sup>-1</sup> at follow-up (i.e. an increase by 3.3%) in the intervention group whereas the change in the control group was 1.69 vs. 1.73 L O<sub>2</sub> min<sup>-1</sup> (i.e. an increase by 2.3%). Based on adjusted ITT regression analyses children who started bicycling to school did not improve fitness (beta = 0.0336911, p= 0.458) compared to controls. Likewise based on adjusted estimates from efficacy analyses children who started bicycling to school did not improve fitness (beta = 0.0425191, p= 0.404) compared to controls. There was a significant association (p<0.001) between kilometers bicycled to school and fitness improvement (figure 2).

#### Change in composite Z score from baseline to follow-up

Crude comparisons of the effects within groups showed that the standardised composite Z score decreased from 0.01 at baseline to -0.26 at follow-up in the intervention group, whereas in the control group the corresponding change was from 0.01 to 0.28.

Based on adjusted ITT regression analyses children who started bicycling to school lowered their composite standardised Z score (beta = -0.58, p=0.012) compared to controls. Based on adjusted efficacy analyses children who started bicycling to school lowered their standardised composite Z score (beta = -0.63, p=0.015) compared to controls. There was no significant association (p=0.512) between kilometers bicycled to school and change in composite Z score.

Post hoc regression analyses of the 6 Z transformed delta variables included in the composite score showed that every single variable, although statistically non-significant individually, contributed to the lower standardised composite score in the intervention group. Standardised delta coefficients were: Inverse fitness -0.085867 (p= 0.458), systolic blood pressure -0.1074832 (p=0.644), sum of 4 skinfolds -

1  
2  
3  
4 0.1522508 (p=0.118), triglyceride -0.2713089 (p=0.295), cholesterol ratio -0.0405599 (p=0.838), HOMA  
5 score -0.4582449 (p=0.049).  
6  
7  
8  
9  
10  
11  
12  
13  
14  
15  
16  
17  
18  
19  
20  
21  
22  
23  
24  
25  
26  
27  
28  
29  
30  
31  
32  
33  
34  
35  
36  
37  
38  
39  
40  
41  
42  
43  
44  
45  
46  
47  
48  
49  
50  
51  
52  
53  
54  
55  
56  
57  
58  
59  
60

For peer review only

## DISCUSSION

### Statement of principal findings

The main finding in this study was that bicycling to school for a period of 8 weeks significantly lowered clustering of cardiometabolic risk factors by 0.58 SD. The effect size estimate was different between the control and the intervention group in ITT analyses, though not all participants were fully compliant during the study period. The level of statistical significance of the clustered risk score was statistically significant even when multiple testing (due to two outcomes) was taken into account with the conservative Bonferroni method [20].

Standardized residuals were plotted against the predicted values and no systematic patterns were observed which confirmed variance-homogeneity. QQ plots and Shapiro wilks tests of the standardized residuals of the model expressed normality. The goodness of fit as indicated by r-squared values in the regression modeling of change in the standardised composite Z score were 0.16 and 0.19 for ITT and efficacy analyses respectively. Goodness of fit for the modeling of change in  $\dot{V}O_2$  peak was 0.17 and 0.18 for ITT and efficacy analyses respectively (for additional results from the regression analyses see supplement 2).

Post hoc regression analyses of the 6 Z transformed delta variables included in the composite score showed that every included variable contributed to the improved clustered score. This is noteworthy since it indicates a consistent positive effect of cycling to school on a range of various health parameters.

The composite risk factor score was used in order to compensate for the day-to-day fluctuation in the single risk factors and included the same variables as in previous studies by our group[6]. A continuous score as a proxy of the metabolic syndrome was chosen in favor of a dichotomous outcome in order to enhance statistical sensitivity, and because it is considered to describe the metabolic health condition better [21]. Further, none of the children had MS according to the definition by the International Diabetes Federation [22].

Bicycling to school did not have the expected effect on cardiorespiratory fitness per se since no significant difference between cyclists and controls was observed. This was contra intuitive since 4.6-5.9 % higher aerobic power has been reported in cross sectional studies comparing adolescents bicycling to school to walkers and passive transporters [23]. Furthermore a 9 % improvement has been found in children who started bicycling to school in prospective studies by Cooper et al. [24]. The discrepancy might be due to a relatively short intervention period in the present study and perhaps also because of too short distance to school. The latter being indirectly indicated from the significant association between kilometers bicycled to school and cardiorespiratory fitness improvement. In this connection it is noteworthy that a 7.3%



1  
2  
3  
4 improvement in  $\dot{V}O_{2\max}$  [25] has been observed in a randomised study of adults who started bicycling to  
5 work and that the commuting trip on average was about 5km, which is twice the distance of the children  
6 included in this study. Interestingly post-hoc linear regression showed that both the relative average and  
7 the relative maximal intensity during commuter bicycling was positively associated (see data supplement 1)  
8 with cardiorespiratory fitness improvements ( $p=0.005$  and  $p=0.002$  respectively).  
9

10  
11  
12 Finally, we cannot rule out that the non-significant difference in changes of  $\dot{V}O_{2\text{peak}}$  between groups  
13 could be a consequence of lack of statistical power (i.e. type II-error) since a change in  $\dot{V}O_{2\text{peak}}$  by 10%  
14 would require 21 perfectly compliant participants in both groups to be powered at 80%. The preliminary  
15 power calculations in the present study were based on expected change in  $\dot{V}O_{2\text{peak}}$  since no previous data  
16 on the potential effect of bicycling to school on cardiometabolic health were available.  
17  
18  
19

### 20 21 22 **Compliance**

23 Participants did not exhibit a behavior that was fully in accordance to the group they were randomised into.  
24 During the intervention period five participants in the intervention group bicycled less than 80% of all  
25 possible trips to school, and one participant in the control group cycled more than 20% of all trips to school  
26 by bike. A relative cutoff value of 80% was set allowing room for participants to be included in the efficacy  
27 analyses though subject to sickness, bike theft and the like. This arbitrary relative cutoff was preferred to  
28 an absolute due to slightly varying study duration and coincides well with the frequency of bicycling  
29 observed in the underlying population. In the ITT analyses we maintained the strengths of the RCT-design  
30 and accounted for potential known and unknown confounding through inclusion of all allocated  
31 participants in the analyses knowing that the true health potential of bicycling to school is likely to be larger  
32 than our estimates. In supplementary efficacy analyses we accounted for the non-compliance and found  
33 slightly larger effect estimates for both composite Z score and  $\dot{V}O_{2\text{peak}}$ . We included "non-bicycling"  
34 participants based on self-reported mode of transportation to school. From the transport diaries it was  
35 possible to assess whether participants in the period preceding the study had in fact been non-bicycling and  
36 meeting inclusion criteria (as self-claimed). Four participants in the control group and one in the  
37 intervention unfortunately bicycled more than 20% of possible trips to school in the two weeks pre-  
38 baseline period. Participants were kept in both ITT and efficacy-analyses though their appearance possibly  
39 diluted the true effect of commuter bicycling to school. It is evident that acceptance and understanding of  
40 randomisation of transport to school was a challenge. Transport to school is an integrated part of the daily  
41 logistics of the entire family making compliance highly susceptible to various factors such as parental job  
42 situation, parental marital status and sudden extra vacation.  
43  
44  
45  
46  
47  
48  
49  
50  
51  
52  
53  
54  
55  
56  
57  
58  
59  
60

### Strengths and weaknesses of the study

The major strength of this study was the randomised design which through elimination of bias allowed for investigation of a causal relationship between bicycling to school and health outcomes. Compliance was supported by inclusion of participants from numerous classes consequently diminishing the risk of contamination between groups. Direct measurements of  $\dot{V}O_2$  peak and all baseline and follow-up measurements being carried out by the same experienced, and blinded test personnel are likewise study strengths. Furthermore detailed information on the degree of exposure before (allowing assessment of fulfillment of inclusion criteria) and during (e.g. mode of transportation to school, amount of bicycling to school, amount of bicycling beyond commuter bicycling, commuter bicycling intensity, general physical activity level) the study is advantageous. A study weakness was a relatively small study sample not behaving perfectly in accordance to the group randomised into, and consequently possible compromised the detection of an effect of bicycling to school on cardiorespiratory fitness. It is likely that the amount of total bicycling assessed from SMS-reported odometer status were underestimated because some odometers reset due to malfunction. Possible this underestimation is biased as the intervention group generally bicycled more trips and thus was more susceptible to theft and malfunction. This, however, is not crucial in the present study focusing on commuter bicycling being assessed from the transport diaries. Field measurements of commuter bicycling intensity and distance are based solely on one single trip to school and should therefore be taken with caution. Finally we cannot rule out that the field measurements have been biased due to the Hawthorne effect (i.e. children may have changed their behavior as they knew they were being studied). A possible Hawthorne effect should, however, beside from the field measurements be equal in the two study arms.

### Recruitment

It was feasible to carry out the present study because it is relatively safe and feasible to bicycle to school in Denmark. The recruitment of participants, however, turned out to be rather difficult partly due to the fact that approximately 60% of children in the region already bicycled to school[9] and thus not includable. From the remaining 40% some lived too far away from the school to bicycle, while others lived so close that they preferred to continue walking. Others were unable or unwilling to have their daily transport dictated by a randomisation. The recruitment difficulties forced us to include participants living closer to the school than our pre-determined inclusion criteria of 2km. The inference of inclusion of children with short commuter distance is that the observed effect of the present study had greater external validity. We experienced that direct personal contact to school pupils was the most efficient way to recruit participants.

### Exposure in the intervention group

In the field test children bicycled to school at a self-chosen average intensity of 73.6% of maximal heart rate, which is similar to Finnish adults who commute at a relative intensity of approximately 73.5-78.6%[26]. The relative intensities for adult commuting were converted from %VO<sub>2</sub>peak to %maximal heart rate by means of the regression equation reported by Swain[27]. Interestingly, web-assessed distance to school was 2.27 km (SD = 1.55) in the intervention group, whereas GPS-assessed distance in the same group was 2.13 km (SD = 1.51) (p = 0.08). Thus, though needed to be investigated further, self-reported commuter distance in children seem to be valid with (SD delta variable = 0.34).

Despite short school travelling distance, short study duration and non-perfect compliance among the participants included in our ITT-analyses, a significantly decrease in sum of Z score was found in the intervention group compared to the control group. Accelerometer measurements conducted midway in the study indicated that this decrease was not mediated through an increased level of general physical activity since neither mean count nor adjusted minutes at various intensity levels (the latter not included in the results section) were statistically significant different between groups. Our rationale for including children walking to school was based on previous studies reporting no significant differences in various measures of physical fitness between participants walking to school and those using passive transport[8,23].

### Main message

Though comparison of effect sizes should be done with caution[28] a lowering of the composite Z score by 0.58 is substantial. In comparison an increase in continuous metabolic syndrome score of 1 has been associated with an odds ratio of developing type-2 diabetes mellitus of 3.4 and 5.1 in men and women, respectively, and odds ratio for cardiovascular disease of 1.7[29]. Consequently a lowering of metabolic syndrome score by 0.58 could theoretically lower the odds of developing diabetes about 45% and CVD around 25%. In conclusion bicycling to school counteracted a clustering of cardiometabolic risk factors and should thus be recognized as potential prevention of type 2 diabetes mellitus and cardiovascular disease.

### Figure legends:

Figure 1. Participants flow diagram

Figure 2. Dose-response between bicycling to school and fitness improvement in the intervention group.

**Acknowledgments**

We thank the participating children and parents and the Biomedical Laboratory Scientists.

**Contributors**

LØ designed the study, performed the randomisation, analysed and interpreted data, drafted the manuscript, and is guarantor. JT collected, analysed and interpreted the data and revised the manuscript. LAB revised the manuscript. LBA interpreted data and revised the manuscript. All authors approved the submitted version of the manuscript.

**Funding source**

The study was financed by Trygffonden and supported by the municipality of Odense. The study sponsors had no role in the study design, the collection, analysis, or interpretation of the data, the writing of the report, or the decision to submit the paper for publication. The corresponding author had full access to all the data in the study and had final responsibility to submit for publication.

**Competing interests**

All authors have completed the ICMJE uniform disclosure form at [www.icmje.org/coi\\_disclosure.pdf](http://www.icmje.org/coi_disclosure.pdf) (available on request from the corresponding author) and declare: no support from any organisation for the submitted work.

**Ethical approval**

The study was approved by the regional Ethics Committee. Written informed consent was obtained from the child's parent or legal guardian.

**Data sharing statement**

Data will not be publically accessible. However, interested individuals may contact the corresponding author.

**Licence for publication**

"The Corresponding Author has the right to grant on behalf of all authors and does grant on behalf of all authors, a worldwide licence to the Publishers and its licensees in perpetuity, in all forms, formats and media (whether known now or created in the future), to i) publish, reproduce, distribute, display and store the Contribution, ii) translate the Contribution into other languages, create adaptations, reprints, include within collections and create summaries, extracts and/or, abstracts of the Contribution, iii) create any other derivative work(s) based on the Contribution, iv) to exploit all subsidiary rights in the Contribution, v) the inclusion of electronic links from the Contribution to third party material where-ever it may be located; and, vi) licence any third party to do any or all of the above."

## REFERENCES

1. Grundy SM. Metabolic syndrome pandemic. *Arteriosclerosis, thrombosis, and vascular biology* 2008;28(4):629-36.
2. Weiss R, Dziura J, Burgert TS, et al. Obesity and the metabolic syndrome in children and adolescents. *The New England journal of medicine* 2004;350(23):2362-74.
3. Gami AS, Witt BJ, Howard DE, et al. Metabolic syndrome and risk of incident cardiovascular events and death: a systematic review and meta-analysis of longitudinal studies. *Journal of the American College of Cardiology* 2007;49(4):403-14.
4. Stern MP, Williams K, Gonzalez-Villalpando C, et al. Does the metabolic syndrome improve identification of individuals at risk of type 2 diabetes and/or cardiovascular disease? *Diabetes care* 2004;27(11):2676-81.
5. Camhi SM, Katzmarzyk PT. Tracking of cardiometabolic risk factor clustering from childhood to adulthood. *International journal of pediatric obesity : IJPO : an official journal of the International Association for the Study of Obesity* 2010;5(2):122-9.
6. Andersen LB, Harro M, Sardinha LB, et al. Physical activity and clustered cardiovascular risk in children: a cross-sectional study (The European Youth Heart Study). *Lancet* 2006;368(9532):299-304.
7. Ekelund U, Anderssen S, Andersen LB, et al. Prevalence and correlates of the metabolic syndrome in a population-based sample of European youth. *The American journal of clinical nutrition* 2009;89(1):90-6.
8. Cooper AR, Wedderkopp N, Wang H, et al. Active travel to school and cardiovascular fitness in Danish children and adolescents. *Medicine and science in sports and exercise* 2006;38(10):1724-31.
9. Østergaard L, Grøntved A, Børrestad LA, et al. Cycling to School Is Associated With Lower BMI and Lower Odds of Being Overweight or Obese in a Large Population-Based Study of Danish Adolescents. *Journal of physical activity & health* 2012;9(5):617-25.
10. Sattelmair J, Pertman J, Ding EL, et al. Dose response between physical activity and risk of coronary heart disease: a meta-analysis. *Circulation* 2011;124(7):789-95.
11. Department\_For\_Transport. National Travel Survey: 2010. Accessed February 28 2012. <http://assets.dft.gov.uk/statistics/releases/national-travel-survey-2010/nts2010-01.pdf>.
12. Lubans DR, Boreham CA, Kelly P, et al. The relationship between active travel to school and health-related fitness in children and adolescents: a systematic review. *The international journal of behavioral nutrition and physical activity* 2011;8:5.
13. Schulz KF, Grimes DA. Generation of allocation sequences in randomised trials: chance, not choice. *Lancet* 2002;359(9305):515-9.
14. Cole TJ, Bellizzi MC, Flegal KM, et al. Establishing a standard definition for child overweight and obesity worldwide: international survey. *BMJ* 2000;320(7244):1240-3.
15. Matthews DR, Hosker JP, Rudenski AS, et al. Homeostasis model assessment: insulin resistance and beta-cell function from fasting plasma glucose and insulin concentrations in man. *Diabetologia* 1985;28(7):412-9.
16. Kolle E, Steene-Johannessen J, Andersen LB, et al. Objectively assessed physical activity and aerobic fitness in a population-based sample of Norwegian 9- and 15-year-olds. *Scandinavian journal of medicine & science in sports* 2010;20(1):e41-7.
17. Trost SG, Loprinzi PD, Moore R, et al. Comparison of accelerometer cut points for predicting activity intensity in youth. *Medicine and science in sports and exercise* 2011;43(7):1360-8.
18. Møller NC, Kristensen PL, Wedderkopp N, et al. Objectively measured habitual physical activity in 1997/1998 vs 2003/2004 in Danish children: the European Youth Heart Study. *Scandinavian journal of medicine & science in sports* 2009;19(1):19-29.
19. Twisk J, Proper K. Evaluation of the results of a randomized controlled trial: how to define changes between baseline and follow-up. *Journal of clinical epidemiology* 2004;57(3):223-8.

- 1
- 2
- 3
- 4 20. Pocock SJ. Clinical trials with multiple outcomes: a statistical perspective on their design, analysis, and
- 5 interpretation. *Controlled clinical trials* 1997;18(6):530-45; discussion 46-9.
- 6
- 7 21. Eisenmann JC. On the use of a continuous metabolic syndrome score in pediatric research.
- 8 *Cardiovascular diabetology* 2008;7:17.
- 9
- 10 22. Ford ES, Li C, Zhao G, et al. Prevalence of the metabolic syndrome among U.S. adolescents using the
- 11 definition from the International Diabetes Federation. *Diabetes care* 2008;31(3):587-9.
- 12
- 13 23. Andersen LB, Lawlor DA, Cooper AR, et al. Physical fitness in relation to transport to school in
- 14 adolescents: the Danish youth and sports study. *Scandinavian journal of medicine & science in*
- 15 *sports* 2009;19(3):406-11.
- 16
- 17 24. Cooper AR, Wedderkopp N, Jago R, et al. Longitudinal associations of cycling to school with adolescent
- 18 fitness. *Preventive medicine* 2008;47(3):324-8.
- 19
- 20 25. Møller NC, Østergaard L, Gade JR, et al. The effect on cardiorespiratory fitness after an 8-week period of
- 21 commuter cycling--a randomized controlled study in adults. *Preventive medicine* 2011;53(3):172-7.
- 22
- 23 26. Oja P MA, Heinonen A, Kukkonen-Harjula K, et al. Physiological effects of walking and cycling to work.
- 24 *Scandinavian journal of medicine & science in sports* 1991(1):151-57.
- 25
- 26 27. Swain DP, Abernathy KS, Smith CS, et al. Target heart rates for the development of cardiorespiratory
- 27 fitness. *Medicine and science in sports and exercise* 1994;26(1):112-6.
- 28
- 29 28. McGough JJ, Faraone SV. Estimating the size of treatment effects: moving beyond p values. *Psychiatry*
- 30 *(Edgmont)* 2009;6(10):21-9.
- 31
- 32 29. Hillier TA, Rousseau A, Lange C, et al. Practical way to assess metabolic syndrome using a continuous
- 33 score obtained from principal components analysis. *Diabetologia* 2006;49(7):1528-35.
- 34
- 35
- 36
- 37
- 38
- 39
- 40
- 41
- 42
- 43
- 44
- 45
- 46
- 47
- 48
- 49
- 50
- 51
- 52
- 53
- 54
- 55
- 56
- 57
- 58
- 59
- 60

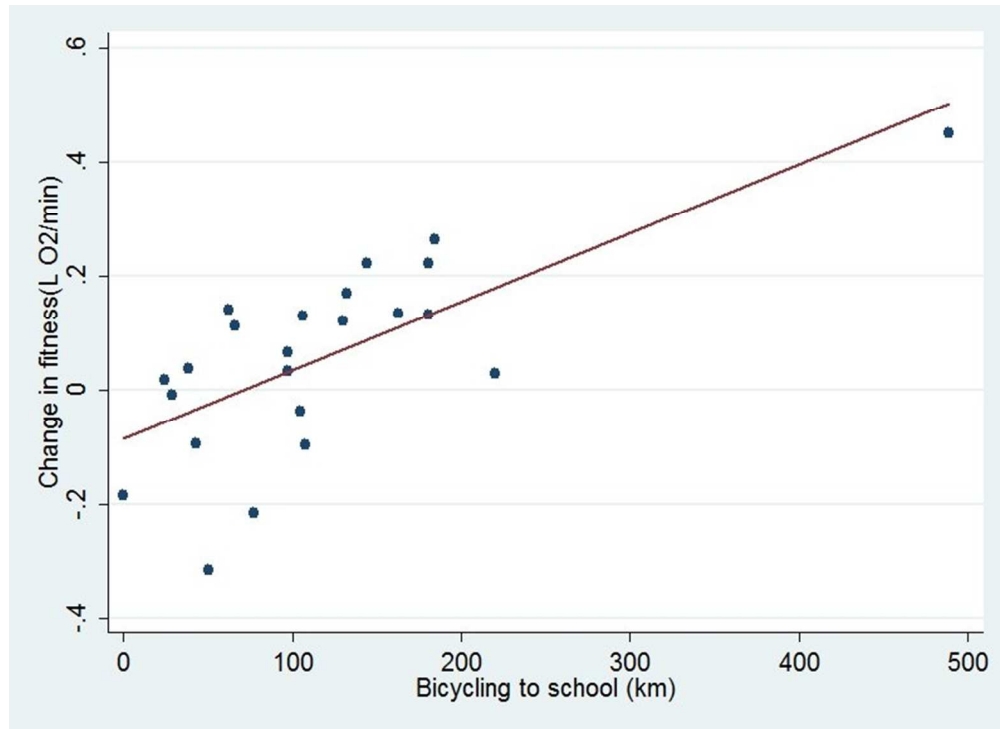

Figure 2. Dose-response between bicycling to school and fitness improvement in the intervention group  
67x49mm (300 x 300 DPI)

View only



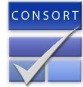

## CONSORT 2010 checklist of information to include when reporting a randomised trial\*

| Section/Topic                    | Item No | Checklist item                                                                                                                                                                              | Reported on page No |
|----------------------------------|---------|---------------------------------------------------------------------------------------------------------------------------------------------------------------------------------------------|---------------------|
| <b>Title and abstract</b>        |         |                                                                                                                                                                                             |                     |
|                                  | 1a      | Identification as a randomised trial in the title                                                                                                                                           | 1                   |
|                                  | 1b      | Structured summary of trial design, methods, results, and conclusions (for specific guidance see CONSORT for abstracts)                                                                     | 2                   |
| <b>Introduction</b>              |         |                                                                                                                                                                                             |                     |
| Background and objectives        | 2a      | Scientific background and explanation of rationale                                                                                                                                          | 4                   |
|                                  | 2b      | Specific objectives or hypotheses                                                                                                                                                           | 4                   |
| <b>Methods</b>                   |         |                                                                                                                                                                                             |                     |
| Trial design                     | 3a      | Description of trial design (such as parallel, factorial) including allocation ratio                                                                                                        | 5                   |
|                                  | 3b      | Important changes to methods after trial commencement (such as eligibility criteria), with reasons                                                                                          | 13                  |
| Participants                     | 4a      | Eligibility criteria for participants                                                                                                                                                       | 5                   |
|                                  | 4b      | Settings and locations where the data were collected                                                                                                                                        | 5                   |
| Interventions                    | 5       | The interventions for each group with sufficient details to allow replication, including how and when they were actually administered                                                       | 5                   |
| Outcomes                         | 6a      | Completely defined pre-specified primary and secondary outcome measures, including how and when they were assessed                                                                          | 5                   |
|                                  | 6b      | Any changes to trial outcomes after the trial commenced, with reasons                                                                                                                       |                     |
| Sample size                      | 7a      | How sample size was determined                                                                                                                                                              | 9                   |
|                                  | 7b      | When applicable, explanation of any interim analyses and stopping guidelines                                                                                                                |                     |
| <b>Randomisation:</b>            |         |                                                                                                                                                                                             |                     |
| Sequence generation              | 8a      | Method used to generate the random allocation sequence                                                                                                                                      | 5                   |
|                                  | 8b      | Type of randomisation; details of any restriction (such as blocking and block size)                                                                                                         | 5                   |
| Allocation concealment mechanism | 9       | Mechanism used to implement the random allocation sequence (such as sequentially numbered containers), describing any steps taken to conceal the sequence until interventions were assigned | 5                   |
| Implementation                   | 10      | Who generated the random allocation sequence, who enrolled participants, and who assigned participants to interventions                                                                     | 15                  |
| Blinding                         | 11a     | If done, who was blinded after assignment to interventions (for example, participants, care providers, those                                                                                | 5+12                |



|                                                      |     |                                                                                                                                                   |            |
|------------------------------------------------------|-----|---------------------------------------------------------------------------------------------------------------------------------------------------|------------|
|                                                      |     | assessing outcomes) and how                                                                                                                       |            |
|                                                      | 11b | If relevant, description of the similarity of interventions                                                                                       |            |
| Statistical methods                                  | 12a | Statistical methods used to compare groups for primary and secondary outcomes                                                                     | 8          |
|                                                      | 12b | Methods for additional analyses, such as subgroup analyses and adjusted analyses                                                                  | 8          |
| <b>Results</b>                                       |     |                                                                                                                                                   |            |
| Participant flow (a diagram is strongly recommended) | 13a | For each group, the numbers of participants who were randomly assigned, received intended treatment, and were analysed for the primary outcome    | 5+figure 1 |
|                                                      | 13b | For each group, losses and exclusions after randomisation, together with reasons                                                                  | 5          |
| Recruitment                                          | 14a | Dates defining the periods of recruitment and follow-up                                                                                           | 5          |
|                                                      | 14b | Why the trial ended or was stopped                                                                                                                |            |
| Baseline data                                        | 15  | A table showing baseline demographic and clinical characteristics for each group                                                                  | Table 1    |
| Numbers analysed                                     | 16  | For each group, number of participants (denominator) included in each analysis and whether the analysis was by original assigned groups           | 12         |
| Outcomes and estimation                              | 17a | For each primary and secondary outcome, results for each group, and the estimated effect size and its precision (such as 95% confidence interval) | 10         |
|                                                      | 17b | For binary outcomes, presentation of both absolute and relative effect sizes is recommended                                                       |            |
| Ancillary analyses                                   | 18  | Results of any other analyses performed, including subgroup analyses and adjusted analyses, distinguishing pre-specified from exploratory         | 10         |
| Harms                                                | 19  | All important harms or unintended effects in each group (for specific guidance see CONSORT for harms)                                             |            |
| <b>Discussion</b>                                    |     |                                                                                                                                                   |            |
| Limitations                                          | 20  | Trial limitations, addressing sources of potential bias, imprecision, and, if relevant, multiplicity of analyses                                  | 12         |
| Generalisability                                     | 21  | Generalisability (external validity, applicability) of the trial findings                                                                         | 13         |
| Interpretation                                       | 22  | Interpretation consistent with results, balancing benefits and harms, and considering other relevant evidence                                     | 14         |
| <b>Other information</b>                             |     |                                                                                                                                                   |            |
| Registration                                         | 23  | Registration number and name of trial registry                                                                                                    | 5          |
| Protocol                                             | 24  | Where the full trial protocol can be accessed, if available                                                                                       |            |
| Funding                                              | 25  | Sources of funding and other support (such as supply of drugs), role of funders                                                                   | 15         |

\*We strongly recommend reading this statement in conjunction with the CONSORT 2010 Explanation and Elaboration for important clarifications on all the items. If relevant, we also recommend reading CONSORT extensions for cluster randomised trials, non-inferiority and equivalence trials, non-pharmacological treatments, herbal interventions, and pragmatic trials. Additional extensions are forthcoming: for those and for up to date references relevant to this checklist, see [www.consort-statement.org](http://www.consort-statement.org).

1  
2  
3  
4  
5  
6  
7  
8  
9  
10  
11  
12  
13  
14  
15  
16  
17  
18  
19  
20  
21  
22  
23  
24  
25  
26  
27  
28  
29  
30  
31  
32  
33  
34  
35  
36  
37  
38  
39  
40  
41  
42  
43  
44  
45  
46  
47  
48  
49  
50  
51  
52  
53  
54  
55  
56  
57  
58  
59  
60

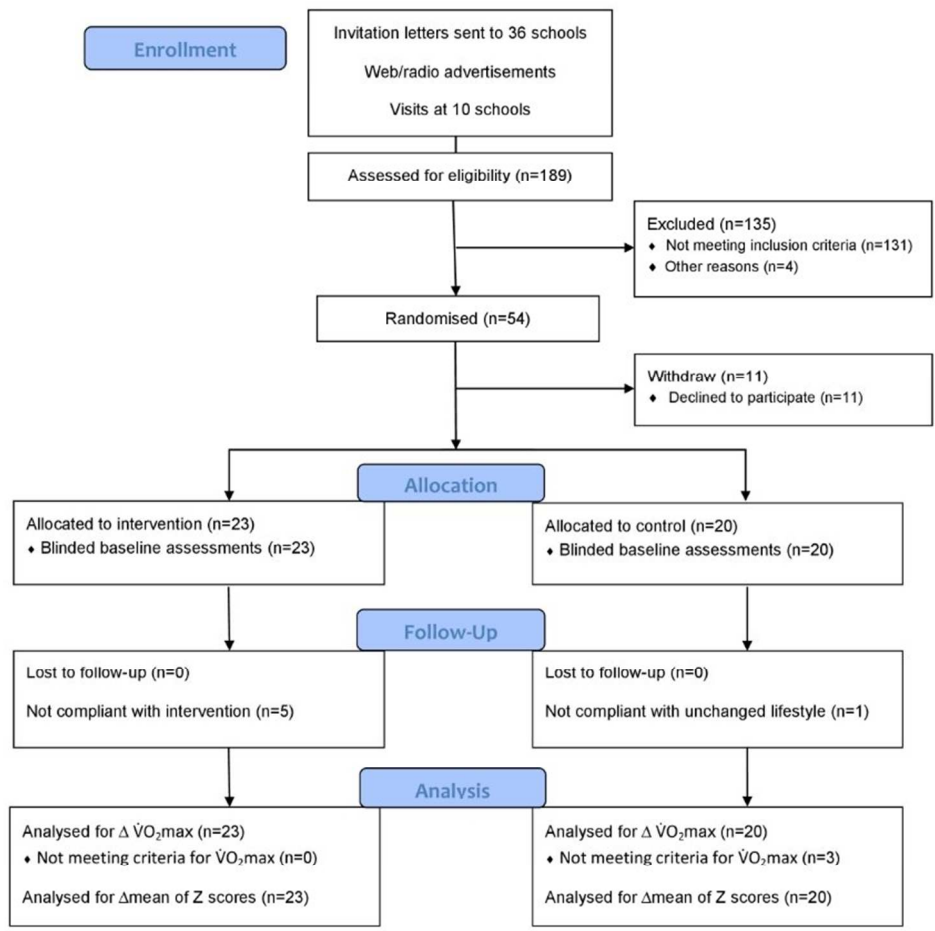

Figure 1. Participants flow diagram

only

1  
2  
3  
4 **TITLE PAGE**  
5  
6  
7  
89 **Bicycling to school improves the cardiometabolic risk factor profile: a randomised controlled trial**  
10  
1112  
13 Lars Østergaard<sup>1</sup>, Line A B Børrestad<sup>1,2</sup>, Jakob Tarp<sup>1</sup>, Lars Bo Andersen<sup>1,3</sup>  
14  
1516  
17 <sup>1</sup>Center for Research in Childhood Health, Institute of Sports Science and Clinical Biomechanics, University  
18 of Southern Denmark, Odense (5230), Denmark  
1920  
21 <sup>2</sup>Institute of Public Health, Sport and Nutrition, Faculty of Health and Sport, University of Agder,  
22 Kristiansand (4604), Norway  
2324  
25 <sup>3</sup>Department of Sports Medicine, Norwegian School of Sport Sciences, Oslo (0863), Norway.  
26  
2728  
29 Correspondence to: [lostergaard@health.sdu.dk](mailto:lostergaard@health.sdu.dk)  
3031  
32 Keywords: cardiometabolic, risk factors, bicycling, children, commuting  
3334  
35 Word count: Abstract: 199, Main text: 4.343  
36  
37  
38  
39  
40  
41  
42  
43  
44  
45  
46  
47  
48  
49  
50  
51  
52  
53  
54  
55  
56  
57  
58  
59  
60

**ABSTRACT****Objectives:**

To investigate whether bicycling to school improve cardiometabolic risk factor profile and cardiorespiratory fitness among children.

**Design:**

Prospective, blinded, randomised controlled trial.

**Setting:**

Single centre study in Odense, Denmark.

**Participants:**

43 children previously not bicycling to school were randomly allocated to control group (n=20) (i.e. no change in lifestyle) or intervention group (i.e. bicycling to school) (n=23).

**Primary and secondary outcome measures:**

Change in cardiometabolic risk factor score and change in cardiorespiratory fitness.

**Results:**

All participants measured at baseline returned at follow-up. Based upon intention to treat analyses, clustering of cardiometabolic risk factors was lowered by 0.58 SD (95% CI -1.03 to -0.14, p= 0.012) in the bicycling group compared to the control group. Cardiorespiratory fitness ( $L O_2 \cdot min^{-1}$ ) per se did not increase significantly more in the intervention than in the control group (beta = 0.0337, 95% CI -0.06 to 0.12, p=0.458).

**Conclusions:**

Bicycling to school counteracted a clustering of cardiometabolic risk factors and should thus be recognized as potential prevention of type 2 diabetes mellitus and cardiovascular disease. The intervention did, however, not elicit a larger increase in cardiorespiratory fitness in the intervention group as compared to the control group.

**Trial registration:**

Registered at [www.clinicaltrials.gov](http://www.clinicaltrials.gov) (NCT01236222)

## ARTICLE SUMMARY

### Article focus

- Intervention studies investigating whether bicycling to school in fact cause improved cardiometabolic health have not yet been carried out.
- The aim of this study was to investigate whether bicycling to school cause an increase in cardiorespiratory fitness and induce improvement of clustering of cardiometabolic risk factors

### Key messages

- This study is the first study to document that bicycling to school had positive effect on clustering of cardiometabolic risk factors in children.

### Strengths and Limitations

- The major strength of this study was the randomised design which through elimination of bias allowed for investigation of a causal relationship between bicycling to school and health outcomes.
- Relatively weak statistical power and impossibility of blindness of the treatment.

## INTRODUCTION

The metabolic syndrome (MS) is the concurrence of multiple risk factors associated with cardiovascular disease and type 2 diabetes mellitus. Prevalence is between 20-30% of the adult population in most countries[1], and a rising incidence in children and adolescents[2], indicates that the condition represents a major threat to global public health. Exposure of the MS confers a doubled risk of incident cardiovascular event and death[3] and up to 5-times higher risk of developing type 2 diabetes mellitus in adults[4]. Furthermore, since clustering of cardiometabolic risk factors track from childhood to adulthood[5] early prevention of the MS is important in order to prevent occurrence of disease later in life.

In children and adolescents physical activity has the potential to prevent a clustering of risk factors[6], underpinned by the notion that an increase of daily moderate physical activity by 10-20% is associated with 33% lower risk of having the MS[7].

Active commuting such as walking and bicycling to school might be important contributors of preventive physical activity. Observational studies indicate that bicycling to school is beneficial to health since higher cardiorespiratory fitness[8] and lower BMI[9] have been observed in children bicycling to school compared to non-cyclists. If bicycling to school is generally acknowledged as a time-efficient and feasible form of daily physical activity it could potentially target the entire population. From a public health perspective this would be very appealing considering that the greatest health benefits are achieved in the least active individuals [10].

There seems to be wide-ranging scepticism about the opportunity to bicycle to school in industrialized societies. The level of concern, however seems often to be negatively associated with the prevalence of bicycling to school, which in Denmark for instance is about 60% among adolescents [8,9]whereas in the UK approximately 2% bicycle to school [11].

Intervention studies investigating whether bicycling to school in fact cause improved cardiometabolic health have not yet been carried out. One reason for this could be that very few countries have an infrastructure allowing safe commuting by bike to school. Another reason could be that interventions often include change in the built environment in order to provide safe routes and this is difficult to control in a rigid study design.

The evidence linking bicycle commuting with cardiometabolic health in children is still limited [and experimental studies investigating causality have been requested \[12\]](#). Hence, the aim of this study is to investigate, in a randomised trial, whether bicycling to school cause an increase in cardiorespiratory fitness and induce improvement of clustering of cardiometabolic risk factors.

## METHODS

### Study participants

This study took place in Denmark in the municipality of Odense during spring 2011. Participants were recruited through invitation letters sent to 36 elementary public schools in the municipality of Odense. Investigators then visited 10 of these schools (approximately 92 classes) and presented the project. Additionally, the project was presented online and in a radio spot. Participants were included if they [at the time of registration stated that they](#) had not bicycled regularly to and from school for at least 3 months ([i.e. at least from January onwards](#)) prior to the intervention, and if willing to be randomised to one of the two study groups (i.e. control group or bicycling group). Reasons for exclusion were not having a bike, and/or affirming less than one km between home and school. One hundred and eighty-nine children volunteered to participate in the study. One hundred and thirty-one of these, however, claimed that they bicycled regularly to school, and four withdrew from the study due to a changed family situation. Fifty-four eligible children were subsequently randomised to either control or intervention. After randomisation six and five participants from control and intervention group, respectively, withdrew since they did not accept being randomized, leaving 43 participants in the study (Figure 1). Written informed consent was obtained from the child's parent or legal guardian after they were given a detailed written explanation of the aims of the study, possible hazards, discomfort, and inconvenience, and the option to withdraw at any time. The study was approved by the regional Ethics Committee (S-20100009) and registered at [clinicaltrials.gov](http://clinicaltrials.gov) (NCT01236222) with the purpose of investigating the effect of bicycling to school on the metabolic syndrome and aerobic fitness.

### Study design and intervention

Participants were randomly assigned to a control group (i.e. no change in lifestyle) or to an experimental group (i.e. commuter bicycling). A permuted random block size (2, 4 and 6) randomisation ([www.randomization.com](http://www.randomization.com)) was used in order to reduce the chances of the assignment schedule being seen by those responsible for recruitment of participants[13]. Twenty participants were allocated to the control group and 23 participants to the bicycling group. All measurements were repeated at the conclusion of the 8-week intervention program. There were no restrictions beside the mode of transportation to school. The study period comprised one week of national holiday and additionally two bank holidays where no children attended school. Matching baseline test date with follow-up test ([in order to achieve similar intervention duration between subjects](#)) was strived for, but logistically not possible for all participants. This has implications on the amount of exposure the intervention group was able to accumulate. Participants could maximally accumulate between 56 and 74 trips to and from school during

1  
2  
3  
4 the study period. All measurements at baseline and follow-up were conducted by personal blinded to group  
5 allocation. Children were picked up and returned to their home addresses when scheduled for baseline and  
6 follow-up tests.  
7  
8

### 9 10 **Measurements**

11 Height was measured by a stadiometer (SECA, Hamburg, Germany), children wearing socks or bare feet and  
12 weight was assessed by a 0.1 kg precision scale (Soehnle Professional, Murrhardt, Germany) wearing only  
13 shorts and t-shirts. Skinfold thickness was measured on the left side with a Harpenden caliper (John Bull,  
14 British Indicators Ltd., West Sussex, England) at the biceps, triceps, subcapsular, and suprailiac sites.  
15 Overweight/obesity status was defined according to age- and gender specific published cut-points for  
16 BMI[14].  
17  
18

19 Systolic and diastolic blood pressure was measured by a sphygmomanometer (DINAMAP ProCare  
20 100, General electric, USA). At least five measurements were made on the left arm with two min interval  
21 and the mean of the final three measurements were used as systolic and diastolic pressure.  
22  
23

24 All Children were instructed to fast overnight (>8 hours), and only allowed to drink water until the  
25 blood sample was drawn. Blood was drawn from the right fossa cubitus by a biomedical laboratory  
26 scientist. If a participant had not been fasting or if he/she had experienced any illness during the last week,  
27 a new test day was scheduled for that child. Samples were analysed for: Glucose, insulin, cholesterol,  
28 triglyceride. Insulin resistance was estimated according to the homoeostasis model assessment (HOMA) as  
29 the product of fasting glucose (mmol/L) and insulin ( $\mu\text{U}/\text{mL}$ ) divided by the constant 22.5[15]. Breakfast  
30 was served on site subsequent of blood sampling. All analysis of the blood specimens were conducted at  
31 Department of Clinical Biochemistry and Pharmacology, Odense Universityhospital  
32  
33

34 Aerobic fitness ( $\dot{V}\text{O}_2\text{peak}$ ) was determined in a progressive bicycle test with on an electronically  
35 braked ergometer (Monark 839 Ergomedic, Varberg, Sweden). Pulmonary gas exchange was measured with  
36 a metabolic cart (Amis2001, Innovision, Denmark) with 15 seconds epoch, and the highest value within 30  
37 seconds was regarded as a maximal if **respiratory exchange ratio** (RER)  $\geq 0.99$  or maximal **heart rate** (HR)  
38 was  $\geq 185$  beats/min, and the test leader judged the participant to show signs of intense effort (e.g. facial  
39 flushing or difficulties in keeping up the pedal frequency)[16]. **HR** was measured with a HRM (Polar  
40 RS800CX, Kempele, Finland) with epoch set to 1 sec. Children were thoroughly explained the purpose of the  
41 test and that it would require a maximal effort. After a warm-up period of 5 minutes at 40W, work-load  
42 was increased 40W every 2 minutes until volitional exertion. Verbal encouragement was given throughout  
43 the test and recommended pedaling cadence was 60-80 rpm.  
44  
45  
46  
47  
48  
49  
50  
51  
52  
53  
54  
55  
56  
57  
58  
59  
60



1  
2  
3  
4 Children completed a general questionnaire regarding transportation to school, sports-habits, and  
5 general quality of life. At follow up all children marked their route to school using a web-based map tool  
6 ([www.loebererute.dk](http://www.loebererute.dk)).  
7

8  
9 All children had their bike equipped with an odometer on average two weeks before baseline  
10 measurement. The odometers were individually calibrated in accordance to wheel circumference.  
11 Odometer levels were self-reported, by participants in both groups, every Sunday until tested at follow-up  
12 by means of a commercial SMS system (SMS-Track ApS). Participants who did not answer Sunday were  
13 contacted Monday. Malfunctioning odometers were replaced within a few days.  
14

15  
16 Both groups were instructed to report daily mode of school transportation on a custom made  
17 transport diary. Total mileage of school related bicycling during the study was calculated from the distance  
18 to school (web route assessment) times the number of trips to/from school (transport diary).  
19

20  
21 Field measurement of intensity of bicycling to school was carried out midway (five weeks after baseline).  
22 Participants in the intervention group received a GPS (Qstarz BT-Q1300S, Qstarz International Inc., Taiwan)  
23 and a heart rate monitor (HRM) (PolarTeam<sup>2</sup>, Polar, Kempele, Finland) and were instructed to wear the  
24 devices during one day. Both GPS and HRM were set at an epoch of 5 second. All GPS data were transferred  
25 to commercial software (Travel recorder v. 5.0) and corrected for drift using manufacturer software. The  
26 GPS was the reference for all HRM data. Mean HR of school transportation, if verified by the diary, was  
27 calculated as the mean of the measurements from the first data point when the child exceeded a speed of  
28 5 km/h when leaving home, to the last data point above 5 km/h when the child arrived at school. Both  
29 compliant and non-compliant participants were included in the determination of commuter bicycling  
30 intensity since the primary outcome is based on intention to treat (ITT) analyses.  
31

32  
33 Physical activity beyond bicycling was assessed with an accelerometer (Actigraph GT3X,  
34 Manufacturing Technology Inc, Fort Walton Beach, FL, USA). Physical activity was monitored for 7  
35 consecutive days from Monday to Sunday at baseline and midway (five weeks after baseline). Instruments  
36 were attached at the hip, and counts were sampled every two seconds. Data reduction was performed with  
37 customised software (Propero, Odense, Denmark). Only data from the vertical axis was included in the data  
38 analyses. Criteria for a successful recording were a minimum of 3 days of 10 h recording per day. Time  
39 periods of at least 30 consecutive minutes of zero counts were deemed to represent periods when the  
40 monitor was not worn and thus disregarded. Cut points for intensity levels were based on the  
41 Freedson/Trost equation[17]. Since cutpoints for physical activity intensity are specifically designed for 1  
42 min epoch these were divided by 30. The average time the accelerometer was worn was 13.5 and 13.6 h  
43 per day at baseline and follow up, respectively, and the number of minutes spent in the different intensity  
44  
45  
46  
47  
48  
49  
50  
51  
52  
53  
54  
55  
56  
57  
58  
59  
60

1  
2  
3  
4 intervals was proportionally adjusted to 14 h with the following equation: adjusted minutes=(observed in  
5 interval) $\times$ (14 $\times$ 60/total minutes) [18].  
6

7 Values for all blood parameters at both baseline and follow-up are missing in one participant from  
8 the intervention group due to needle phobia. Insulin and HOMA values were regarded as missing for one  
9 participant in the control group due to type 1-diabetes. Follow up cholesterol for one person and baseline  
10 HOMA for another participant from the intervention group were not obtained due to irregularity at the  
11 laboratory. Systolic blood pressure is missing in one participant due to resistance.  
12  
13  
14

15 One participant from the intervention group performed maximal tests, but was not measured with  
16 the metabolic cart.  $\dot{V}O_{2peak}$  was in this case estimated from the regression equation between power  
17 output (MPO) and  $\dot{V}O_{2peak}$  of the study sample. Change in  $\dot{V}O_{2peak}$  was considered missing in 3  
18 participants since test criteria was not met at follow-up.  
19  
20  
21  
22

### 23 **Statistics**

24 Crude baseline measurements were compared between the bicycling and the control group participants  
25 using unpaired mean comparison tests (t-tests), whereas paired t-tests were used in within group  
26 comparisons from baseline to follow-up.  
27  
28  
29

30 Post intervention values were analysed across the two groups using analysis of co-variance  
31 (ANCOVA), as suggested by Twisk and Proper[19], with participants grouped as originally randomised  
32 regardless of the degree of intervention compliance and types of activity actually performed. In efficacy  
33 analyses participants are referred to as compliant in the intervention group if at least 80% of possible trips  
34 to school were by bike on contrast participants in the control group are considered compliant if less than  
35 20% of possible trips were by bike. Change in outcome was compared between the bicycling and the  
36 control group with adjustment for baseline measure and gender. All covariates were selected a priori and  
37 thus in any case kept in the statistical modeling even if non-significant. Regression analyses were preceded  
38 by verification of fulfillment of parametric assumptions by qq-plots and Shapiro Wilks tests.  
39  
40  
41  
42  
43

44 Z scores (observed value - baseline mean / baseline SD) were computed for each of the variables  
45 included in the composite Z score. A high Z score value (or an increase) is considered to have adverse health  
46 effects for all variables included in the composite score with exception of cardiorespiratory fitness where  
47 inverse values were calculated. Composite Z scores, based on baseline and follow-up measurements, were  
48 constructed as a mean of the available standardised selected risk factors (fasting triglyceride, insulin  
49 sensitivity (HOMA), sum of four skinfolds, systolic blood pressure, total cholesterol/HDL ratio and inverse  
50 aerobic fitness). Composite baseline and follow-up Z scores were then standardised according to the  
51 baseline mean and SD allowing for interpretation of change in composite Z score. Subsequently the change  
52  
53  
54  
55  
56  
57  
58  
59  
60

1  
2  
3  
4 in standardised composite Z score was calculated as (standardised mean of Z scores at follow up -  
5 standardised mean of Z scores at baseline).  
6

7 Assuming a mean change of 10% in  $\dot{V}O_2$ peak and a SD of change of 0.3 L O<sub>2</sub> min<sup>-1</sup> the study needed  
8 21 participants in both groups to be powered at 80%. All analyses were conducted using STATA IC version  
9 11.0 (STATA Corp, College station) with alpha=0.05.  
10  
11  
12

## 13 14 15 **RESULTS**

### 16 **Background characteristics**

17 Of the 54 participants randomized, 11 declined to participate (two due to moving, one due to personal  
18 reasons, one due to parental job situation, two due to test methods and five not accepting randomisation)  
19 leaving 43 participants (79.6%) in the study. No subjects experienced accidents or other harms. All 43  
20 participants were measured at baseline and returned for follow-up (Fig. 1). Based on published age and  
21 gender BMI cut-off values [14] no participants were obese at baseline, whereas three and two participants  
22 were overweight in the bicycling and control group, respectively. There were no statistical differences  
23 between the control group and the bicycling group participants who completed the 8-week intervention  
24 period on any of the baseline features presented in Table 1, nor was there any baseline difference in the  
25 two primary dependent variables:  $\dot{V}O_2$ peak and mean of Z scores.  
26  
27  
28  
29  
30  
31  
32

33  
34  
35 (insert table 1 here)  
36  
37

### 38 **Adherence**

39 All of the 43 allocated participants were available at follow-up assessments. Five participants in the  
40 intervention group and one in the control group were defined as non-compliant. The average compliance  
41 was 96.2% and 84.2 % in the control and the intervention group, respectively.  
42  
43  
44  
45  
46  
47

48 (insert table 2 here)  
49  
50

51 (insert table 3 here)  
52  
53  
54  
55  
56  
57  
58  
59  
60

### Change in $\dot{V}O_2$ peak from baseline to follow-up

Crude comparisons of the effects within groups showed that  $\dot{V}O_2$  peak mean increased from 1.81 at baseline to 1.87 L O<sub>2</sub> min<sup>-1</sup> at follow-up (i.e. an increase by 3.3%) in the intervention group whereas the change in the control group was 1.69 vs. 1.73 L O<sub>2</sub> min<sup>-1</sup> (i.e. an increase by 2.3%). Based on adjusted ITT regression analyses children who started bicycling to school did not improve fitness (beta = 0.0336911, p= 0.458) compared to controls. Likewise based on adjusted estimates from efficacy analyses children who started bicycling to school did not improve fitness (beta = 0.0425191, p= 0.404) compared to controls. There was a significant association (p<0.001) between kilometers bicycled to school and fitness improvement (figure 2).

### Change in composite Z score from baseline to follow-up

Crude comparisons of the effects within groups showed that the standardised composite Z score decreased from 0.01 at baseline to -0.26 at follow-up in the intervention group, whereas in the control group the corresponding change was from 0.01 to 0.28.

Based on adjusted ITT regression analyses children who started bicycling to school lowered their composite standardised Z score (beta = -0.58, p=0.012) compared to controls. Based on adjusted efficacy analyses children who started bicycling to school lowered their standardised composite Z score (beta = -0.63, p=0.015) compared to controls. There was no significant association (p=0.512) between kilometers bicycled to school and change in composite Z score.

Post hoc regression analyses of the 6 Z transformed delta variables included in the composite score showed that every single variable, although statistically non-significant individually, contributed to the lower standardised composite score in the intervention group. Standardised delta coefficients were: Inverse fitness -0.085867 (p= 0.458), systolic blood pressure -0.1074832 (p=0.644), sum of 4 skinfolds -0.1522508 (p=0.118), triglyceride -0.2713089 (p=0.295), cholesterol ratio -0.0405599 (p=0.838), HOMA score -0.4582449 (p=0.049).

(insert table 4 here)

## DISCUSSION

### Statement of principal findings

The main finding in this study was that bicycling to school for a period of 8 weeks significantly lowered clustering of cardiometabolic risk factors by 0.58 SD. The effect size estimate was different between the control and the intervention group in ITT analyses, though not all participants were fully compliant during the study period. The level of statistical significance of the clustered risk score was statistically significant even when multiple testing (due to two outcomes) was taken into account with the conservative Bonferroni method [20].

Standardized residuals were plotted against the predicted values and no systematic patterns were observed which confirmed variance-homogeneity. QQ plots and Shapiro Wilks tests of the standardized residuals of the model expressed normality. The goodness of fit as indicated by r-squared values in the regression modeling of change in the standardised composite Z score were 0.16 and 0.19 for ITT and efficacy analyses respectively. Goodness of fit for the modeling of change in  $\dot{V}O_2$  peak was 0.17 and 0.18 for ITT and efficacy analyses respectively (for additional results from the regression analyses see supplement 2).

Post hoc regression analyses of the 6 Z transformed delta variables included in the composite score showed that every included variable contributed to the improved clustered score. This is noteworthy since it indicates a consistent positive effect of cycling to school on a range of various health parameters.

The composite risk factor score was used in order to compensate for the day-to-day fluctuation in the single risk factors and included the same variables as in previous studies by our group[6]. A continuous score as a proxy of the metabolic syndrome was chosen in favor of a dichotomous outcome in order to enhance statistical sensitivity, and because it is considered to describe the metabolic health condition better [21]. Further, none of the children had MS according to the definition by the International Diabetes Federation [22].

Bicycling to school did not have the expected effect on cardiorespiratory fitness per se since no significant difference between cyclists and controls was observed. This was contra intuitive since 4.6-5.9 % higher aerobic power has been reported in cross sectional studies comparing adolescents bicycling to school to walkers and passive transporters [23]. Furthermore a 9 % improvement has been found in children who started bicycling to school in prospective studies by Cooper et al. [24]. The discrepancy might be due to a relatively short intervention period in the present study and perhaps also because of too short distance to school. The latter being indirectly indicated from the significant association between kilometers bicycled to

1  
2  
3  
4 school and cardiorespiratory fitness improvement. In this connection it is noteworthy that a 7.3%  
5 improvement in  $\dot{V}O_2\text{max}$  [25] has been observed in a randomised study of adults who started bicycling to  
6 work and that the commuting trip on average was about 5km, which is twice the distance of the children  
7 included in this study. Interestingly post-hoc linear regression showed that both the relative average and  
8 the relative maximal intensity during commuter bicycling was positively associated (see data supplement 1)  
9 with cardiorespiratory fitness improvements ( $p=0.005$  and  $p=0.002$  respectively).  
10  
11  
12  
13

14 Finally, we cannot rule out that the non-significant difference in changes of  $\dot{V}O_2\text{peak}$  between groups  
15 could be a consequence of lack of statistical power (i.e. type II-error) since a change in  $\dot{V}O_2\text{peak}$  by 10%  
16 would require 21 perfectly compliant participants in both groups to be powered at 80%. The preliminary  
17 power calculations in the present study were based on expected change in  $\dot{V}O_2\text{peak}$  since no previous data  
18 on the potential effect of bicycling to school on cardiometabolic health were available.  
19  
20  
21  
22

### 23 Compliance

24 Participants did not exhibit a behavior that was fully in accordance to the group they were randomised into.  
25 During the intervention period five participants in the intervention group bicycled less than 80% of all  
26 possible trips to school, and one participant in the control group cycled more than 20% of all trips to school  
27 by bike. A relative cutoff value of 80% was set allowing room for participants to be included in the efficacy  
28 analyses though subject to sickness, bike theft and the like. This arbitrary relative cutoff was preferred to  
29 an absolute due to slightly varying study duration and coincides well with the frequency of bicycling  
30 observed in the underlying population. In the ITT analyses we maintained the strengths of the RCT-design  
31 and accounted for potential known and unknown confounding through inclusion of all allocated  
32 participants in the analyses knowing that the true health potential of bicycling to school is likely to be larger  
33 than our estimates. In supplementary efficacy analyses we accounted for the non-compliance and found  
34 slightly larger effect estimates for both composite Z score and  $\dot{V}O_2\text{peak}$ . We included "non-bicycling"  
35 participants based on self-reported mode of transportation to school. From the transport diaries it was  
36 possible to assess whether participants in the period preceding the study had in fact been non-bicycling and  
37 meeting inclusion criteria (as self-claimed). Four participants in the control group and one in the  
38 intervention unfortunately bicycled more than 20% of possible trips to school in the two weeks pre-  
39 baseline period. Participants were kept in both ITT and efficacy-analyses though their appearance possibly  
40 diluted the true effect of commuter bicycling to school. It is evident that acceptance and understanding of  
41 randomisation of transport to school was a challenge. Transport to school is an integrated part of the daily  
42 logistics of the entire family making compliance highly susceptible to various factors such as parental job  
43 situation, parental marital status and sudden extra vacation.  
44  
45  
46  
47  
48  
49  
50  
51  
52  
53  
54  
55  
56  
57  
58  
59  
60

### Strengths and weaknesses of the study

The major strength of this study was the randomised design which through elimination of bias allowed for investigation of a causal relationship between bicycling to school and health outcomes. Compliance was supported by inclusion of participants from numerous classes consequently diminishing the risk of contamination between groups. Direct measurements of  $\dot{V}O_2$  peak and all baseline and follow-up measurements being carried out by the same experienced, and blinded test personnel are likewise study strengths. Furthermore detailed information on the degree of exposure before (allowing assessment of fulfillment of inclusion criteria) and during (e.g. mode of transportation to school, amount of bicycling to school, amount of bicycling beyond commuter bicycling, commuter bicycling intensity, general physical activity level) the study is advantageous. A study weakness was a relatively small study sample not behaving perfectly in accordance to the group randomised into, and consequently possible compromised the detection of an effect of bicycling to school on cardiorespiratory fitness. It is likely that the amount of total bicycling assessed from SMS-reported odometer status were underestimated because some odometers reset due to malfunction. Possible this underestimation is biased as the intervention group generally bicycled more trips and thus was more susceptible to theft and malfunction. This, however, is not crucial in the present study focusing on commuter bicycling being assessed from the transport diaries. Field measurements of commuter bicycling intensity and distance are based solely on one single trip to school and should therefore be taken with caution. Finally we cannot rule out that the field measurements have been biased due to the Hawthorne effect (i.e. children may have changed their behavior as they knew they were being studied). A possible Hawthorne effect should, however, beside from the field measurements be equal in the two study arms.

### Recruitment

It was feasible to carry out the present study because it is relatively safe and feasible to bicycle to school in Denmark. The recruitment of participants, however, turned out to be rather difficult partly due to the fact that approximately 60% of children in the region already bicycled to school[9] and thus not includable. From the remaining 40% some lived too far away from the school to bicycle, while others lived so close that they preferred to continue walking. Others were unable or unwilling to have their daily transport dictated by a randomisation. The recruitment difficulties forced us to include participants living closer to the school than our pre-determined inclusion criteria of 2km. The inference of inclusion of children with short commuter distance is that the observed effect of the present study had greater external validity. [We experienced that direct personal contact to school pupils was the most efficient way to recruit participants.](#)



### Exposure in the intervention group

In the field test children bicycled to school at a self-chosen average intensity of 73.6% of maximal heart rate, which is similar to Finnish adults who commute at a relative intensity of approximately 73.5-78.6%[26]. The relative intensities for adult commuting were converted from %VO<sub>2</sub>peak to %maximal heart rate by means of the regression equation reported by Swain[27]. Interestingly, web-assessed distance to school was 2.27 km (SD = 1.55) in the intervention group, whereas GPS-assessed distance in the same group was 2.13 km (SD = 1.51) (p = 0.08). Thus, though needed to be investigated further, self-reported commuter distance in children seem to be valid with (SD delta variable = 0.34).

Despite short school travelling distance, short study duration and non-perfect compliance among the participants included in our ITT-analyses, a significantly decrease in sum of Z score was found in the intervention group compared to the control group. Accelerometer measurements conducted midway in the study indicated that this decrease was not mediated through an increased level of general physical activity since neither mean count nor adjusted minutes at various intensity levels (the latter not included in the results section) were statistically significant different between groups. Our rationale for including children walking to school was based on previous studies reporting no significant differences in various measures of physical fitness between participants walking to school and those using passive transport[8,23].

### Main message

Though comparison of effect sizes should be done with caution[28] a lowering of the composite Z score by 0.58 is substantial. In comparison an increase in continuous metabolic syndrome score of 1 has been associated with an odds ratio of developing type-2 diabetes mellitus of 3.4 and 5.1 in men and women, respectively, and odds ratio for cardiovascular disease of 1.7[29]. Consequently a lowering of metabolic syndrome score by 0.58 could theoretically lower the odds of developing diabetes about 45% and CVD around 25%. **In conclusion bicycling to school counteracted a clustering of cardiometabolic risk factors and should thus be recognized as potential prevention of type 2 diabetes mellitus and cardiovascular disease.**

### Figure legends:

Figure 1. Participants flow diagram

Figure 2. Dose-response between bicycling to school and fitness improvement in the intervention group.



**Acknowledgments**

We thank the participating children and parents and the Biomedical Laboratory Scientists.

**Contributors**

LØ designed the study, performed the randomisation, analysed and interpreted data, drafted the manuscript, and is guarantor. JT collected, analysed and interpreted the data and revised the manuscript. LAB revised the manuscript. LBA interpreted data and revised the manuscript. All authors approved the submitted version of the manuscript.

**Funding source**

The study was financed by Trygffonden and supported by the municipality of Odense. The study sponsors had no role in the study design, the collection, analysis, or interpretation of the data, the writing of the report, or the decision to submit the paper for publication. The corresponding author had full access to all the data in the study and had final responsibility to submit for publication.

**Competing interests**

All authors have completed the ICMJE uniform disclosure form at [www.icmje.org/coi\\_disclosure.pdf](http://www.icmje.org/coi_disclosure.pdf) (available on request from the corresponding author) and declare: no support from any organisation for the submitted work.

**Ethical approval**

The study was approved by the regional Ethics Committee. Written informed consent was obtained from the child's parent or legal guardian.

**Data sharing statement**

Data will not be publically accessible. However, interested individuals may contact the corresponding author.

**Licence for publication**

"The Corresponding Author has the right to grant on behalf of all authors and does grant on behalf of all authors, a worldwide licence to the Publishers and its licensees in perpetuity, in all forms, formats and media (whether known now or created in the future), to i) publish, reproduce, distribute, display and store the Contribution, ii) translate the Contribution into other languages, create adaptations, reprints, include within collections and create summaries, extracts and/or, abstracts of the Contribution, iii) create any other derivative work(s) based on the Contribution, iv) to exploit all subsidiary rights in the Contribution, v) the inclusion of electronic links from the Contribution to third party material where-ever it may be located; and, vi) licence any third party to do any or all of the above."

## REFERENCES

1. Grundy SM. Metabolic syndrome pandemic. *Arteriosclerosis, thrombosis, and vascular biology* 2008;28(4):629-36.
2. Weiss R, Dziura J, Burgert TS, Tamborlane WV, Taksali SE, Yeckel CW, et al. Obesity and the metabolic syndrome in children and adolescents. *The New England journal of medicine* 2004;350(23):2362-74.
3. Gami AS, Witt BJ, Howard DE, Erwin PJ, Gami LA, Somers VK, et al. Metabolic syndrome and risk of incident cardiovascular events and death: a systematic review and meta-analysis of longitudinal studies. *Journal of the American College of Cardiology* 2007;49(4):403-14.
4. Stern MP, Williams K, Gonzalez-Villalpando C, Hunt KJ, Haffner SM. Does the metabolic syndrome improve identification of individuals at risk of type 2 diabetes and/or cardiovascular disease? *Diabetes care* 2004;27(11):2676-81.
5. Camhi SM, Katzmarzyk PT. Tracking of cardiometabolic risk factor clustering from childhood to adulthood. *International journal of pediatric obesity : IJPO : an official journal of the International Association for the Study of Obesity* 2010;5(2):122-9.
6. Andersen LB, Harro M, Sardinha LB, Froberg K, Ekelund U, Brage S, et al. Physical activity and clustered cardiovascular risk in children: a cross-sectional study (The European Youth Heart Study). *Lancet* 2006;368(9532):299-304.
7. Ekelund U, Anderssen S, Andersen LB, Riddoch CJ, Sardinha LB, Luan J, et al. Prevalence and correlates of the metabolic syndrome in a population-based sample of European youth. *The American journal of clinical nutrition* 2009;89(1):90-6.
8. Cooper AR, Wedderkopp N, Wang H, Andersen LB, Froberg K, Page AS. Active travel to school and cardiovascular fitness in Danish children and adolescents. *Medicine and science in sports and exercise* 2006;38(10):1724-31.
9. Østergaard L, Grøntved A, Børrestad LA, Froberg K, Gravesen M, Andersen LB. Cycling to School Is Associated With Lower BMI and Lower Odds of Being Overweight or Obese in a Large Population-Based Study of Danish Adolescents. *Journal of physical activity & health* 2012;9(5):617-25.
10. Sattelmair J, Pertman J, Ding EL, Kohl HW, 3rd, Haskell W, Lee IM. Dose response between physical activity and risk of coronary heart disease: a meta-analysis. *Circulation* 2011;124(7):789-95.
11. Department\_For\_Transport. National Travel Survey: 2010. Accessed February 28 2012. <http://assets.dft.gov.uk/statistics/releases/national-travel-survey-2010/nts2010-01.pdf>.
12. Lubans DR, Boreham CA, Kelly P, Foster CE. The relationship between active travel to school and health-related fitness in children and adolescents: a systematic review. *The international journal of behavioral nutrition and physical activity* 2011;8:5.
13. Schulz KF, Grimes DA. Generation of allocation sequences in randomised trials: chance, not choice. *Lancet* 2002;359(9305):515-9.
14. Cole TJ, Bellizzi MC, Flegal KM, Dietz WH. Establishing a standard definition for child overweight and obesity worldwide: international survey. *BMJ* 2000;320(7244):1240-3.
15. Matthews DR, Hosker JP, Rudenski AS, Naylor BA, Treacher DF, Turner RC. Homeostasis model assessment: insulin resistance and beta-cell function from fasting plasma glucose and insulin concentrations in man. *Diabetologia* 1985;28(7):412-9.
16. Kolle E, Steene-Johannessen J, Andersen LB, Anderssen SA. Objectively assessed physical activity and aerobic fitness in a population-based sample of Norwegian 9- and 15-year-olds. *Scandinavian journal of medicine & science in sports* 2010;20(1):e41-7.
17. Trost SG, Loprinzi PD, Moore R, Pfeiffer KA. Comparison of accelerometer cut points for predicting activity intensity in youth. *Medicine and science in sports and exercise* 2011;43(7):1360-8.
18. Møller NC, Kristensen PL, Wedderkopp N, Andersen LB, Froberg K. Objectively measured habitual physical activity in 1997/1998 vs 2003/2004 in Danish children: the European Youth Heart Study. *Scandinavian journal of medicine & science in sports* 2009;19(1):19-29.

19. Twisk J, Proper K. Evaluation of the results of a randomized controlled trial: how to define changes between baseline and follow-up. *Journal of clinical epidemiology* 2004;57(3):223-8.
20. Pocock SJ. Clinical trials with multiple outcomes: a statistical perspective on their design, analysis, and interpretation. *Controlled clinical trials* 1997;18(6):530-45; discussion 46-9.
21. Eisenmann JC. On the use of a continuous metabolic syndrome score in pediatric research. *Cardiovascular diabetology* 2008;7:17.
22. Ford ES, Li C, Zhao G, Pearson WS, Mokdad AH. Prevalence of the metabolic syndrome among U.S. adolescents using the definition from the International Diabetes Federation. *Diabetes care* 2008;31(3):587-9.
23. Andersen LB, Lawlor DA, Cooper AR, Froberg K, Anderssen SA. Physical fitness in relation to transport to school in adolescents: the Danish youth and sports study. *Scandinavian journal of medicine & science in sports* 2009;19(3):406-11.
24. Cooper AR, Wedderkopp N, Jago R, Kristensen PL, Møller NC, Froberg K, et al. Longitudinal associations of cycling to school with adolescent fitness. *Preventive medicine* 2008;47(3):324-8.
25. Møller NC, Østergaard L, Gade JR, Nielsen JL, Andersen LB. The effect on cardiorespiratory fitness after an 8-week period of commuter cycling--a randomized controlled study in adults. *Preventive medicine* 2011;53(3):172-7.
26. Oja P MA, Heinonen A, Kukkonen-Harjula K, Laukkanen R, Pasanen M, Vuori I. Physiological effects of walking and cycling to work. *Scandinavian journal of medicine & science in sports* 1991(1):151-57.
27. Swain DP, Abernathy KS, Smith CS, Lee SJ, Bunn SA. Target heart rates for the development of cardiorespiratory fitness. *Medicine and science in sports and exercise* 1994;26(1):112-6.
28. McGough JJ, Faraone SV. Estimating the size of treatment effects: moving beyond p values. *Psychiatry (Edgmont)* 2009;6(10):21-9.
29. Hillier TA, Rousseau A, Lange C, Lepinay P, Cailleau M, Novak M, et al. Practical way to assess metabolic syndrome using a continuous score obtained from principal components analysis. *Diabetologia* 2006;49(7):1528-35.

1  
2  
3  
4  
5  
6  
7  
8  
9  
10  
11  
12  
13  
14  
15  
16  
17  
18  
19  
20  
21  
22  
23  
24  
25  
26  
27  
28  
29  
30  
31  
32  
33  
34  
35  
36  
37  
38  
39  
40  
41  
42  
43  
44  
45  
46  
47  
48  
49  
50  
51  
52  
53  
54  
55  
56  
57  
58  
59  
60

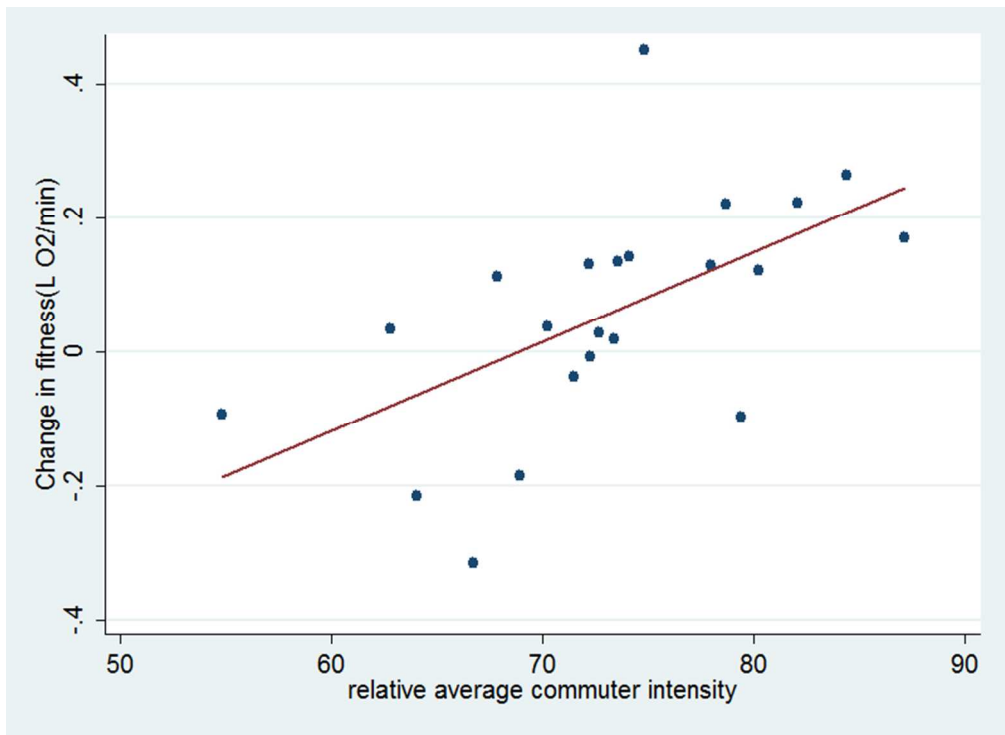

Association between relative average commuter intensity and cardiorespiratory fitness improvements  
281x204mm (72 x 72 DPI)

view only

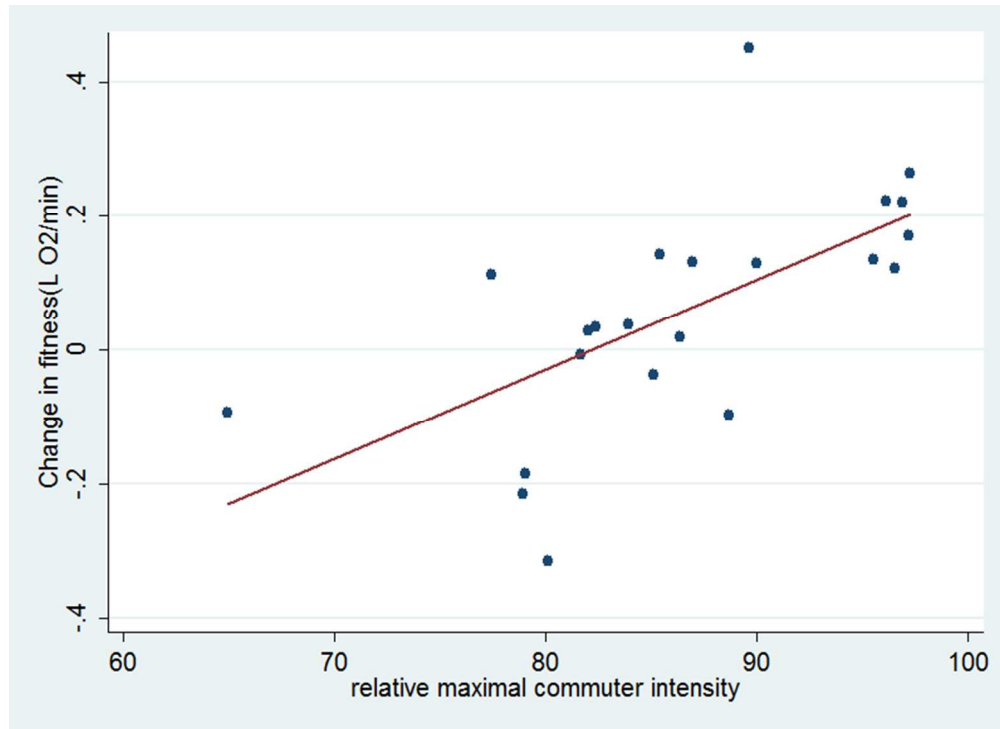

Association between relative maximal commuter intensity and cardiorespiratory fitness improvements  
281x204mm (72 x 72 DPI)

view only

## Data supplement 2. Results from regression analyses

 **$\dot{V}O_2$  peak change (intention to treat)**

|                            | Beta    | SE     | t     | P     |
|----------------------------|---------|--------|-------|-------|
| Baseline $\dot{V}O_2$ peak | -0.1524 | 0.0600 | -2.54 | 0.016 |
| Group (intervention)       | 0.0337  | 0.0449 | 0.75  | 0.458 |
| Gender (female)            | -0.0030 | 0.0475 | -0.06 | 0.950 |
| Constant                   | 0.3008  | 0.1161 | 2.59  | 0.014 |

 **$\dot{V}O_2$  peak change (per protocol)**

|                            | Beta    | SE     | t     | P     |
|----------------------------|---------|--------|-------|-------|
| Baseline $\dot{V}O_2$ peak | -0.1569 | 0.0642 | -2.44 | 0.021 |
| Group (intervention)       | 0.0425  | 0.0502 | 0.85  | 0.404 |
| Gender (female)            | -0.0111 | 0.0527 | -0.21 | 0.835 |
| Constant                   | 0.3076  | 0.1232 | 2.50  | 0.018 |

**Composite Z score change (intention to treat)**

|                            | Beta    | SE     | t     | P     |
|----------------------------|---------|--------|-------|-------|
| Baseline composite Z-score | -0.0387 | 0.1194 | -0.32 | 0.748 |
| Group (intervention)       | -0.5838 | 0.2208 | -2.64 | 0.012 |
| Gender (female)            | 0.1164  | 0.2414 | 0.48  | 0.632 |
| Constant                   | 0.4129  | 0.1883 | 2.19  | 0.034 |

**Composite Z score change (per protocol)**

|                            | Beta    | SE     | t     | P     |
|----------------------------|---------|--------|-------|-------|
| Baseline composite Z-score | -0.1562 | 0.1574 | -0.99 | 0.328 |
| Group (intervention)       | -0.6282 | 0.2435 | -2.58 | 0.015 |
| Gender (female)            | 0.0856  | 0.2529 | 0.34  | 0.737 |
| Constant                   | 0.4253  | 0.1994 | 2.13  | 0.040 |
