# Supplementary figures and images for: Bicycling to school improves the cardiometabolic risk factor profile: a randomised controlled trial
Source: HighWire-hosted journal article supplement (doi:10.1136/bmjopen-2012-001307), 2012-01-01

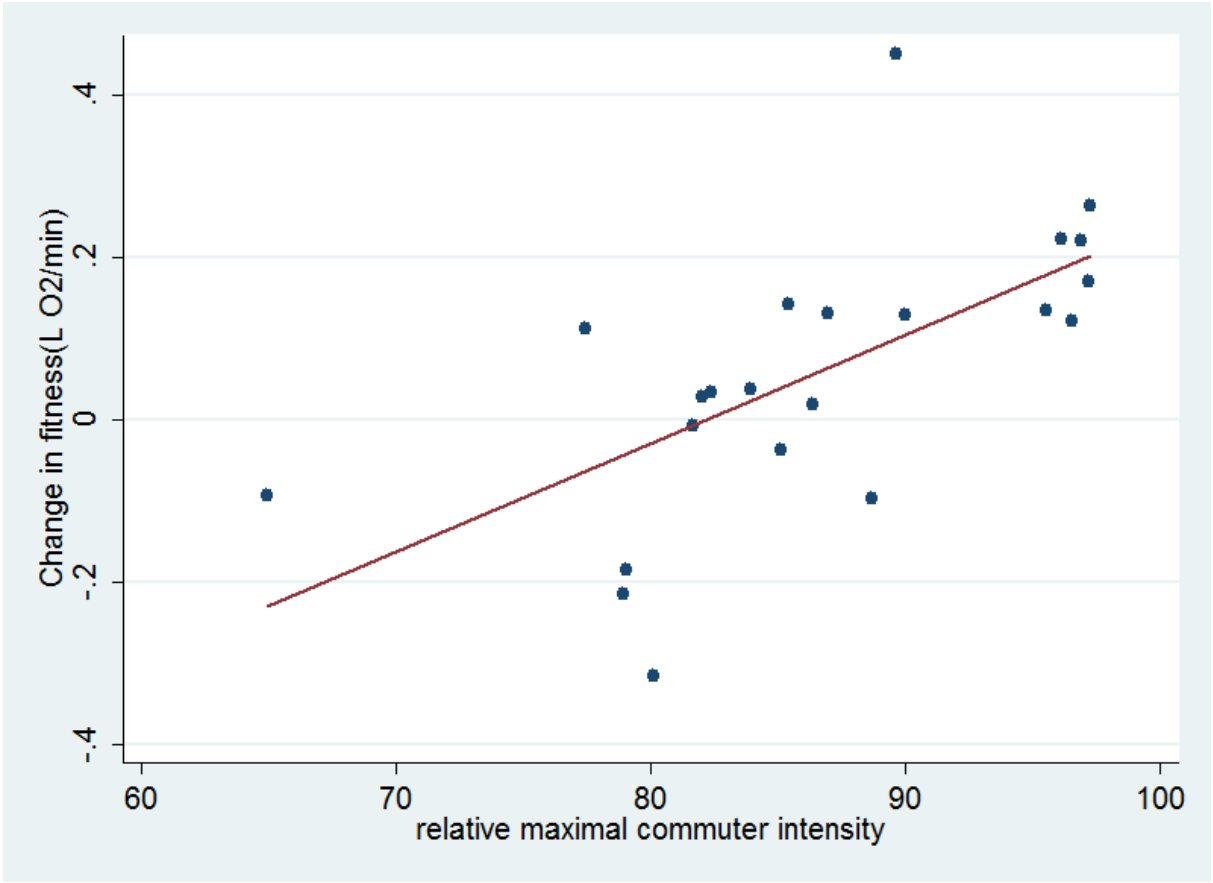

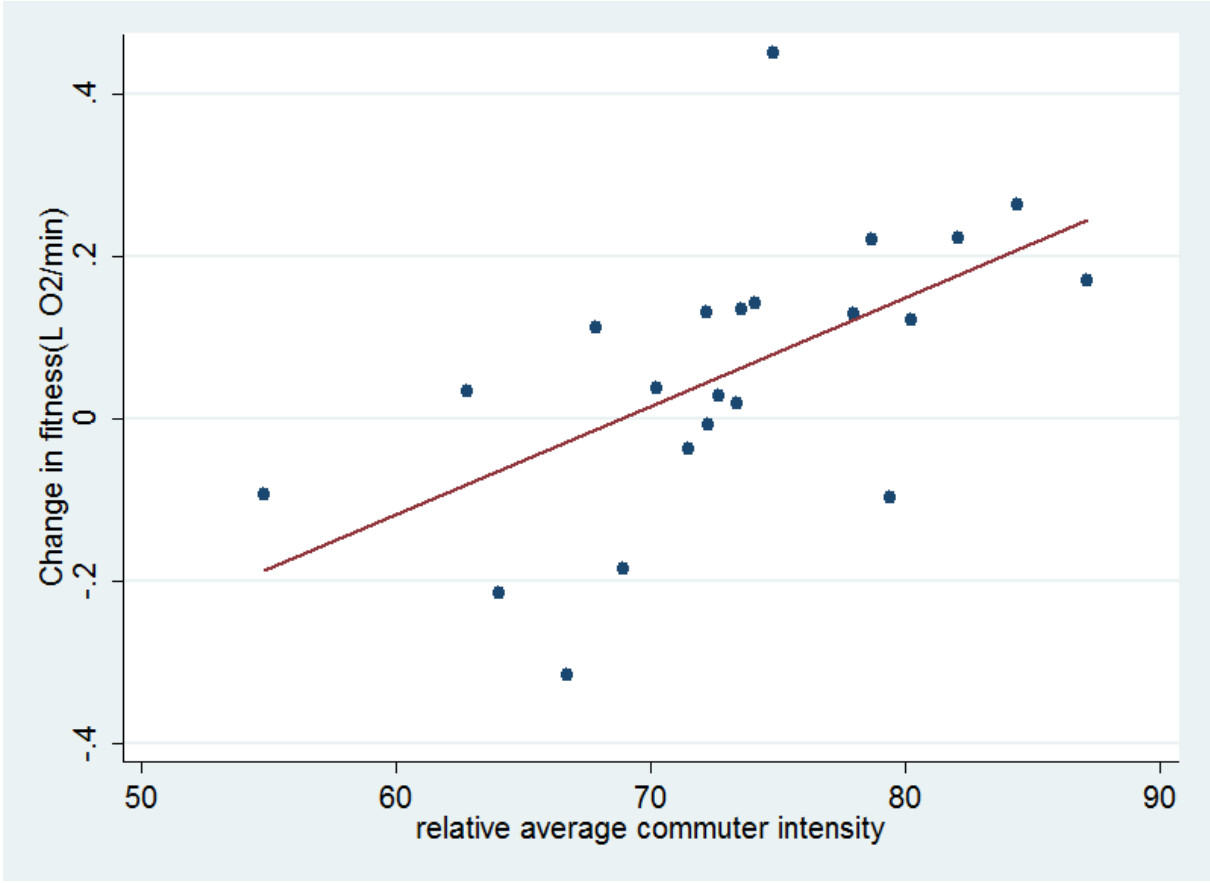

Supplement: bmjopen-2012-001307supp_figures.pdf [file bmjopen-2012-001307supp_figures.pdf]
